1           **Chelator sensing and lipopeptide interplay mediates molecular**  
2           **interspecies interactions between soil bacilli and pseudomonads**

3  
4 Sofija Andric<sup>1\*</sup>, Thibault Meyer<sup>1,Φ\*</sup>, Augustin Rigolet<sup>1</sup>, Anthony Argüelles Arias<sup>1</sup>, Sébastien Steels<sup>1</sup>,  
5 Grégory Hoff<sup>1,#</sup>, Monica Höfte<sup>2</sup>, René De Mot<sup>3</sup>, Andrea McCann<sup>4</sup>, Edwin De Pauw<sup>4</sup> and Marc  
6 Ongena<sup>1</sup>

7  
8 <sup>1</sup>Microbial Processes and Interactions Laboratory, Terra Teaching and Research Center, Gembloux Agro-Bio  
9 Tech, University of Liège, Gembloux, Belgium

10 <sup>2</sup>Laboratory of Phytopathology, Department of Plants and Crops, Faculty of Bioscience engineering, Ghent  
11 University, Gent, Belgium

12 <sup>3</sup>Centre of Microbial and Plant Genetics, Faculty of Bioscience Engineering, University of Leuven, Heverlee,  
13 Belgium

14 <sup>4</sup>Mass Spectrometry Laboratory, , MolSys Research Unit, Department of Chemistry, University of Liège,  
15 Belgium

16 <sup>Φ</sup> Current address: UMR Ecologie Microbienne, F-69622, University of Lyon, Université Claude Bernard Lyon  
17 1, CNRS, INRAE, VetAgro Sup, Villeurbanne, France

18 <sup>#</sup> Current address: Ecology and Biodiversity, Department of Biology, Utrecht University, Padualaan 8, 3584  
19 CH, Utrecht, The Netherlands

20  
21 \* Equal contribution

23

24 **Abstract**

25

26 Some bacterial species are important members of the rhizosphere microbiome and confer  
27 protection to the host plant against pathogens. However, our knowledge of the multitrophic  
28 interactions determining the ecological fitness of these biocontrol bacteria in their highly competitive  
29 natural niche is still limited. In this work, we investigated the molecular mechanisms underlying  
30 interactions between *B. velezensis*, considered as model plant-associated and beneficial species in  
31 the *Bacillus* genus, and *Pseudomonas* as a rhizosphere-dwelling competitor. Our data show that *B.*  
32 *velezensis* boosts its arsenal of specialized antibacterials upon the perception of the secondary  
33 siderophore enantio-pyochelin produced by phylogenetically distinct pseudomonads and some  
34 other genera. We postulate that *B. velezensis* has developed some chelator sensing systems to  
35 learn about the identity of its surrounding competitors. Illustrating the multifaceted molecular  
36 response of *Bacillus*, surfactin is another crucial component of the secondary metabolome  
37 mobilized in interbacteria competition. Its accumulation not only enhances motility but,  
38 unexpectedly, the lipopeptide also acts as a chemical trap that reduces the toxicity of other  
39 lipopeptides released by *Pseudomonas* challengers. This in turn favors the persistence of *Bacillus*  
40 populations upon competitive root colonization. Our work thus highlights new ecological roles for  
41 bacterial secondary metabolites acting as key drivers of social interactions.

42

43

44

45 Soil is one of the richest ecosystems in terms of microbial diversity and abundance<sup>1</sup>. However, the  
46 scarcity of resources makes it one of the most privileged environments for competitive interspecies  
47 interactions<sup>2,3</sup>. A subset of the bulk soil microbes has evolved to dwell in the rhizosphere  
48 compartment surrounding roots due to continued nutrient-enriched exudation from the plant.  
49 Compared to bulk soil, microbial warfare in the rhizosphere is presumably even more intense as the  
50 habitat is spatially restricted and more densely populated<sup>3</sup>. Besides rivalry for nutrients  
51 (exploitative), interference competition is considered a key factor driving microbial interactions and  
52 community assembly. This competition can involve signal interference or toxins deployed by  
53 contact-dependent delivery systems<sup>4,5</sup> but is mainly mediated at distance through the emission of  
54 various molecular weapons. The molecular basis of interference interactions and their phenotypic  
55 outcomes between diverse soil bacterial species have been amply investigated in the last  
56 decade<sup>6,7</sup>.

57 Bacilli belonging to the *B. subtilis* complex are ubiquitous members of the rhizosphere  
58 microbiome<sup>2,8,9</sup>. Among these species, *B. velezensis* has emerged as plant-associated model  
59 bacilli, displaying strong potential as biocontrol agent reducing diseases caused by  
60 phytopathogens<sup>10</sup>. *B. velezensis* distinguishes itself from other species of the *B. subtilis* group by its  
61 richness in biosynthetic gene clusters (BGCs, representing up to 13% of the whole genome)  
62 responsible for the synthesis of bioactive secondary metabolites (BSMs)<sup>11,12</sup>. This chemically-  
63 diverse secondary metabolome includes volatiles, terpenes, non-ribosomal (NR) dipeptides, cyclic  
64 lipopeptides (CLPs) and polyketides (PKs), but also ribosomally synthesized lantibiotics and larger  
65 bacteriocins (RiPP)<sup>13,14</sup>. BSMs are involved in biocontrol activity via direct inhibition of pathogenic  
66 microbes and/or via stimulation of the plant immune system<sup>15,16</sup>. From an ecological viewpoint,  
67 BSMs also contribute to competitiveness in the rhizosphere niche thanks to multiple and

68 complementary functions as drivers of developmental traits, as antimicrobials, or as signals  
69 initiating cross-talk with the host plant<sup>17-19</sup>.

70 Mostly guided by practical concerns for use as biocontrol agents, research on BSMs has  
71 mainly focused on the characterization of their biological activities. However, the impact of  
72 environmental factors that may modulate their expression under natural conditions still remains  
73 poorly understood. It includes interactions with other organisms sharing the niche. Some recent  
74 reports illustrate how soil bacilli may adapt their behavior upon sensing bacterial competitors but  
75 almost exclusively focusing on developmental traits (sporulation, biofilm formation, or motility)<sup>7</sup>.  
76 Unlike other genera such as *Streptomyces*, it remains largely unknown to what extent bacilli in  
77 general and *B. velezensis* in particular, may modulate the expression of their secondary  
78 metabolome upon interaction with other bacteria<sup>7,20</sup>. In this work, we investigated the molecular  
79 outcomes of interspecies interactions in which *B. velezensis* may engage. We selected  
80 *Pseudomonas* as challenger considering that species of this genus are also highly competitive and  
81 commonly encountered in rhizosphere microbiomes<sup>8</sup>. We performed experiments under nutritional  
82 conditions mimicking the oligotrophic rhizosphere environment and used contact-independent  
83 settings for pairwise interaction which probably best reflect the real situation in soil. Our data  
84 revealed that the two bacteria initiate multifaceted interactions mostly mediated by the non-  
85 ribosomally synthesized components of their secondary metabolome. We pointed out unsuspected  
86 roles for some of these BSMs in the interaction context. Beyond its role as a metal chelator, the  
87 *Pseudomonas* secondary siderophore enantio-pyochelin (E-PCH) acts as a signal triggering dual  
88 production of PKs and RiPP in *Bacillus*, while specific lipopeptides modulate the inhibitory  
89 interaction between the two species. This results in marked phenotypic changes in *B. velezensis*  
90 such as higher antibacterial potential, enhanced motility and protective effect via chemical trapping.  
91 We also illustrate the relevance of these outcomes in the context of competitive root colonization.

92

## 93 **Results**

### 94 ***B. velezensis* modulates its secondary metabolome and boosts antibacterial activity upon** 95 **sensing *Pseudomonas* metabolites**

96 We used *B. velezensis* strain GA1 as a BSM-rich and genetically amenable isolate representative  
97 of the species. Genome mining with AntiSMASH 5.0<sup>21</sup> confirmed the presence of all gene clusters  
98 necessary for the biosynthesis of known BSMs typically formed by this bacterium (Supplementary  
99 Table 1). Based on the exact mass and absence of the corresponding peaks in deletion mutants,  
100 most of the predicted non-ribosomal (NR) secondary metabolites were identified in cell-free crude  
101 supernatants via optimized UPLC-MS (Supplementary Fig. 1). It includes the whole set of cyclic  
102 lipopeptides (CLPs of the surfactin, fengycin and iturin families) and polyketides (PKs diffidin,  
103 macrolactin and bacillaene) with their multiple co-produced structural variants, as well as the  
104 siderophore bacillibactin. We verified that all these compounds are readily formed in the so-called  
105 exudate-mimicking (EM) medium reflecting the specific content in major carbon sources typically  
106 released by roots of *Solanaceae* (such as tomato) plants<sup>22</sup>. In addition to these NR products, genes  
107 encoding RiPPs such as amylocyclicin and amylolysin are also present in GA1, but these  
108 compounds could not be reliably detected in culture broths. The NR dipeptide bacilysin was also  
109 predicted but not detected. We selected as the main interaction partner the plant-associated  
110 *Pseudomonas* sp. strain CMR12a based on its biocontrol potential and its production of multiple  
111 secondary metabolites<sup>23–27</sup>. Genome mining confirmed the potential of CMR12a to synthesize a  
112 range of BSMs, including antimicrobial phenazines, the siderophores pyoverdine (PVD) (structure  
113 confirmation in Supplementary Fig. 2) and E-PCH as well as two structurally distinct CLPs, sessilins  
114 and orfamides (Supplementary Table 1). In contrast to *Bacillus*, the capacity to co-produce two  
115 different CLPs is a quite rare trait for non-phytopathogenic pseudomonads and represented an  
116 additional criterion for selecting strain CMR12a for this study<sup>23,27–29</sup>. In the case of CMR12a,  
117 according to the exact mass and absence of the corresponding peaks in deletion mutants, all these

118 compounds were detected in EM culture broth but most of them are more efficiently produced upon  
119 growth in casamino acids medium (CAA) commonly used for *Pseudomonas* cultivation  
120 (Supplementary Fig. 1).

121 Our prime objective was to evaluate the intrinsic potential of *B. velezensis* to react to the  
122 perception of *Pseudomonas* metabolites in an experimental setting avoiding interferences due to  
123 diffusion constraints in a semi-solid matrix or due to the formation of impermeable biofilm  
124 structures. The first assays were performed by growing GA1 in agitated liquid EM medium  
125 supplemented or not with (sterile) BSM-containing spent medium of CAA-grown CMR12a (CFS,  
126 cell-free supernatant). At a low dose (2% (v/v)), the addition of this CFS extract led to a marked  
127 increase in the production of some GA1 NR metabolites. Significantly higher amounts were  
128 measured for surfactins, bacillaene or its dehydrated variant dihydrobacillaene (2H-bae), difficidin  
129 or its oxidized form, and bacillibactin (Fig. 1a, b) but not for other compounds such as fengycins,  
130 iturins and macrolactins (Fig. 1a).

131 The boost in BSMs synthesis triggered by *Pseudomonas* CFS was associated with an  
132 increase in the antibacterial activity of the corresponding extracts when tested for growth inhibition  
133 of *Xanthomonas campestris* and *Clavibacter michiganensis* used respectively as representative of  
134 Gram-negative and Gram-positive plant pathogenic bacteria of agronomical importance<sup>30</sup> (Fig. 1c).  
135 Since most of the BSMs are not commercially available and our attempt to purify PKs failed due to  
136 chemical instability, we could not use individual compounds for their specific involvement in  
137 bacterial inhibition. As an alternative, we generated and tested a range of GA1 knockout mutants  
138 including the  $\Delta sfp$  derivative specifically repressed in 4'-phosphopantetheinyl transferase essential  
139 for the proper functioning of the PK and NRP biosynthesis machinery. Full loss of anti-  
140 *Xanthomonas* activity in  $\Delta sfp$  extracts indicated a key role for NR BSMs and ruled out the possible  
141 involvement of other chemicals known for their antibacterial activity such as bacilysin or RiPPs (Fig.  
142 1d). Loss of function of mutants specifically repressed in the synthesis of individual compounds

143 pointed out the key role of (oxy)difficidin and to a lower extent of 2H-bae in *Xanthomonas* inhibition  
144 (Fig. 1d). These two PKs are also responsible for GA1 inhibitory activity toward other important  
145 bacterial phytopathogens such as *Pectobacterium carotovorum*, *Agrobacterium tumefaciens* and  
146 *Rhodococcus fasciens* but are not involved in the inhibition of plant pathogenic *Pseudomonas*  
147 species for which bacilysin may be the active metabolite (Supplementary Fig. 3). However, as  
148 illustrated below, *B. velezensis* does not display significant toxicity against CMR12a and other non-  
149 pathogenic soil *Pseudomonas* isolates tested here. Stimulation of PKs synthesis upon sensing  
150 CMR12a is not specific to GA1 and was also observed in other *B. velezensis* strains with well-  
151 known biocontrol potential such as S499, FZB42 and QST713<sup>31-33</sup> (Supplementary Fig. 4).

152 In contrast to *Xanthomonas*, enhanced antibiotic activity against *Clavibacter* is not mediated  
153 by NR products as shown by the fully conserved activity in the  $\Delta sfp$  mutant (Fig. 1d). Therefore, we  
154 suspected from genomic data and literature<sup>34</sup> that RiPPs such as amylocyclicin could be involved in  
155 inhibition. This hypothesis was supported by the 80% reduction in antibiotic potential observed for  
156 the  $\Delta acnA$  mutant knocked out for the corresponding biosynthesis gene (Fig. 1d). Besides, RT-  
157 qPCR data revealed a highly induced expression of *acnA* gene in GA1 cells upon supplementation  
158 with CMR12a CFS (Fig. 1e). However, we were not able to provide evidence for higher  
159 accumulation of the mature peptide in the medium. Enhanced expression of the *acnA* gene in  
160 presence of *Pseudomonas* products was also observed for strain S499 (Supplementary Fig. 5).

161

## 162 **E-PCH acts as a signal sensed by *Bacillus* to stimulate polyketide production**

163 We next wanted to identify the signaling molecules secreted by *Pseudomonas* that are sensed by  
164 *Bacillus* cells and lead to improved BSMs production. For that purpose, we used 2H-bae as an  
165 indicator of the *Bacillus* response because it represents the most consistent and highly boosted  
166 polyketide. We first compared the triggering potential of CFS obtained from knockout mutants of  
167 CMR12a specifically lacking the different identified metabolites (Supplementary Fig. 1). Only

168 extracts from mutants impaired in the production of siderophores and more specifically E-PCH were  
169 significantly affected in PKs-inducing potential (Fig. 2a). Possible involvement of this compound  
170 was supported by the drastic reduction in the activity of CFS prepared from CMR12a culture in CAA  
171 medium supplemented with  $\text{Fe}^{3+}$  where siderophore expression is repressed (Fig. 2b,  
172 Supplementary Fig. 6). We also performed bioactivity-guided fractionation and data showed that  
173 only extracts containing PVD and/or E-PCH displayed consistent PKs-triggering activity  
174 (Supplementary Fig. 7). HPLC-purified compounds were also tested independently at a  
175 concentration similar to the one measured in CFS CAA extract revealing a much higher PK-  
176 triggering activity for E-PCH compared to the main PVD isoform (Fig. 2b). Dose-dependent assays  
177 further indicated that supplementation with PVD, as strong chelator<sup>35</sup>, caused iron limitation in the  
178 medium which is sensed by GA1. It is supported by the marked increase in production of the  
179 siderophore bacillibactin in GA1 wild-type (Fig. 2c) and by the reduced growth of the  $\Delta dhbC$  mutant,  
180 repressed in bacillibactin synthesis, upon PVD addition (Fig. 2d, Supplementary Fig. 8). This last  
181 result indicates that PVD in its ferric form cannot be taken up by GA1 despite the presence of  
182 several transporters for exogenous siderophores in *B. velezensis* similar to those identified in *B.*  
183 *subtilis*<sup>36,37</sup> based on genome comparison (Supplementary Table 2). Therefore, we assumed that  
184 iron stress mediated by PVD only induces a rather limited boost in PKs production. We validated  
185 that such response is not due to iron starvation by supplementing GA1 culture with increasing  
186 doses of the 2,2'-dipyridyl (DIP) chemical chelator that cannot be taken up by *Bacillus* cells (Fig.  
187 2b). By contrast, the addition of E-PCH with a much lower affinity for iron does not activate  
188 bacillibactin synthesis (Fig. 2c) and does not affect  $\Delta dhbC$  growth at the concentrations used (Fig.  
189 2d, Supplementary Fig. 8). We conclude that the activity of this compound referred to as secondary  
190 siderophore is not related to iron-stress. If internalized, E-PCH can cause oxidative stress and  
191 damage in other bacteria as reported for *E. coli*<sup>38,39</sup>. However, the absence of toxicity toward GA1  
192 indicates that E-PCH is not taken up by *Bacillus* cells and thus clearly acts as a signal molecule



193 perceived at the cell surface. PKs boost also occurred upon addition of CFS obtained from other  
194 *Pseudomonas* isolates producing pyochelin-type siderophores, such as *P. protegens* Pf-5<sup>40</sup>.  
195 However, PKs stimulation was similarly observed in response to *P. tolaasii* CH36<sup>41</sup> which does not  
196 form pyochelin, indicating that other unidentified BSMs may act as triggers in other strains  
197 (Supplementary Fig. 9).

### 198 **Enhanced motility as distance-dependent and surfactin-mediated response of *Bacillus***

199 Surfactin production is stimulated by CMR12a CFS and by pure E-PCH (Fig. 1a and  
200 Supplementary Fig. 10). Based on mutant loss-of-function analysis, this multifunctional CLP does  
201 not contribute to the antibacterial potential of *B. velezensis* (Fig. 1d and Supplementary Fig. 3) but  
202 is known to be notably involved in developmental processes of multicellular communities such as  
203 biofilm formation and motility<sup>42</sup>. Therefore, we wanted to test a possible impact of *Pseudomonas* on  
204 the motile phenotype of *B. velezensis* upon co-cultivation on plates. We observed distance-  
205 dependent enhanced motility on medium containing high agar concentrations (1.5% m/v) which  
206 phenotypically resembles the sliding-type of motility illustrated by typical “van Gogh bundles”<sup>42</sup> (Fig.  
207 3a). This migration pattern is flagellum independent but depends on multiple factors including the  
208 synthesis of surfactin which reduces friction at the cell-substrate interface<sup>42</sup>. We thus suspected  
209 such enhanced motility to derive from an increased formation of the lipopeptide. This was  
210 supported by the almost full loss of migration of the  $\Delta$ *srfaA* mutant in these interaction conditions  
211 (Fig. 3b). Moreover, spatial mapping via MALDI-FT-ICR MS imaging confirmed a higher  
212 accumulation of surfactin ions in the interaction zone and around the *Bacillus* colony when growing  
213 at a short or intermediate distance from the *Pseudomonas* challenger, compared to the largest  
214 distance where the motile phenotype is much less visible (Fig. 3c). These data indicate that *Bacillus*  
215 cells in the microcolony perceive a soluble signal diffusing from the *Pseudomonas* colony over a  
216 limited distance.

217

## 218 **Interplay between CLPs drives antagonistic interactions**

219 Besides modulating secondary metabolite synthesis, we further observed that confrontation with  
220 *Pseudomonas* may also lead to some antagonistic outcomes. GA1 growth as planktonic cells is  
221 slightly inhibited upon supplementation of the medium with 2% v/v CMR12a CFS but this inhibition  
222 is much more marked at a higher dose (Supplementary Fig. 11). To identify the *Pseudomonas*  
223 compound retaining such antibiotic activity, we tested the effect of CFS from various CMR12a  
224 mutants impaired in the synthesis of lipopeptides and/or phenazines. Even if some contribution of  
225 other compounds cannot be ruled out, it revealed that the CLP sessilin is mainly responsible for  
226 toxic activity toward GA1 grown in liquid cultures but also when the two bacteria are grown at close  
227 proximity on gelified EM medium (Fig. 4a). Nevertheless, we observed that the sessilin-mediated  
228 inhibitory effect is markedly reduced by delaying CFS supplementation until 6 h of *Bacillus* culture  
229 instead of adding it at the beginning of incubation (Fig. 4b). This suggested that early secreted  
230 *Bacillus* compounds may counteract the toxic effect of sessilin. We hypothesized that surfactin can  
231 play this role as it is the first detectable BSM to accumulate in significant amounts in the medium  
232 early in the growth phase. We tested the surfactin-deficient mutant in the same conditions and  
233 observed that its growth is still strongly affected indicating that no other GA1 compound may be  
234 involved in toxicity alleviation. Chemical complementation with purified surfactins restored growth to  
235 a large extent, providing further evidence for a protective role of the surfactin lipopeptide (Fig. 4b).  
236 Such sessilin-dependent inhibition also occurred when bacteria were confronted on solid CAA  
237 medium (Fig. 4c-I) favoring *Pseudomonas* BSM production. In these conditions, the formation of a  
238 white precipitate in the interaction zone was observed with CMR12a wild-type but not when GA1  
239 was confronted with the  $\Delta$ sesA mutant (Fig. 4c). UPLC-MS analysis of ethanol extracts from this  
240 white-line area confirmed the presence of sessilin ions but also revealed an accumulation of  
241 surfactin from GA1 in the confrontation zone (Fig. 4d). The involvement of surfactins in precipitate  
242 formation was confirmed by the absence of this white-line upon testing the  $\Delta$ srfaA mutant of GA1

243 (Fig. 4c-I, II). The loss of surfactin production and white-line formation was associated with a higher  
244 sensitivity of the *Bacillus* colony to the sessilin toxin secreted by *Pseudomonas*. Altogether, these  
245 data indicate that surfactin acts as a chemical trap and inactivates sessilin via co-aggregation into  
246 insoluble complexes.

247 A similar CLP-dependent antagonistic interaction and white-line formation were observed  
248 upon co-cultivation of GA1 with *P. tolaasii* strain CH36 producing tolaasin (Fig. 4c-II), a CLP  
249 structurally very similar to sessilin (only differing by two amino acid residues, Supplementary Fig.  
250 12). However, this chemical aggregation is quite specific regarding the type of CLP involved, since  
251 it was not visible upon the interaction of GA1 with other *Pseudomonas* strains forming different CLP  
252 structural groups that are not toxic for *Bacillus* (Fig. 4c-III, see Supplementary Fig. 12 and 13 for  
253 identification and structures). Sessilin/tolaasin-dependent toxicity and white-line formation were  
254 also observed when other surfactin-producing *B. velezensis* isolates were confronted with CMR12a  
255 and CH36 (Supplementary Fig. 14 and 15, respectively). Although the chemical basis and the  
256 stoichiometry of such molecular interaction remain to be determined, it probably follows the same  
257 rules as observed for the association between sessilins/tolaasins and other endogenous  
258 *Pseudomonas* CLPs such as WLIP or orfamides<sup>28</sup> or between CLPs and other unknown  
259 metabolites<sup>43,44</sup>.

260

### 261 **BSMs-mediated interactions drive competitive root colonization**

262 Our *in vitro* data point out how *B. velezensis* may modulate its secondary metabolome when  
263 confronted with *Pseudomonas*. To appreciate the relevance of our findings in a more realistic  
264 context, we next evaluated whether such BSMs interplay may also occur upon root co-colonization  
265 of tomato plantlets and possibly impact *Bacillus* fitness. When inoculated independently, CMR12a  
266 colonized roots more efficiently than GA1 within the first 3 days, most probably due to a higher  
267 intrinsic growth rate<sup>45</sup>. Upon co-inoculation, the CMR12a colonization rate was not affected but GA1

268 populations were reduced compared to mono-inoculated plantlets (Fig. 5a). UPLC-MS analysis of  
269 methanolic extracts prepared from co-bacterized roots (and surrounding medium) revealed  
270 substantial amounts of E-PCH (Supplementary Fig. 16) indicating that the molecule is readily  
271 formed under these conditions and could therefore also act as a signal *in planta*. Probably due to  
272 the low populations of GA1, we could not detect *Bacillus* PKs and RiPPs in these extracts.  
273 However, a significantly enhanced expression of gene clusters responsible for the synthesis of  
274 bacillaene, difficidin and amylocyclicin was observed in GA1 cells co-inoculated with *Pseudomonas*  
275 compared to single inoculation (Fig. 5b). It indicated that the metabolite response observed in GA1  
276 *in vitro* cultures in EM medium may also occur upon competitive colonization where the bacteria  
277 feed exclusively on root exudates.

278 Lipopeptides involved in interference interaction are also readily formed upon single and  
279 dual root colonization (Fig. 5d). We hypothesized that the inhibitory effect of sessilin may impact the  
280 colonization potential of GA1 in presence of CMR12a which was confirmed by the increase in GA1  
281 populations co-inoculated with the  $\Delta$ sesA mutant (Fig. 5c). Moreover, colonization by the  $\Delta$ srfaA  
282 mutant is more impacted compared to WT when co-cultivated with CMR12a and a significant gain  
283 in root establishment is recovered upon co-colonization with the  $\Delta$ sesA mutant (Fig. 5d). The  
284 sessilin-surfactin interplay thus also occurs *in planta*. Sessilin would confer a competitive  
285 advantage to CMR12a during colonization by inhibiting GA1 development but efficient surfactin  
286 production on roots may provide some protection to the *Bacillus* cells.

287

## 288 **Discussion**

289 It has been recently reported that *Pseudomonas* toxin delivery via Type VI secretion system  
290 and antibiotic (2,4-diacetylphloroglucinol) production may impact biofilm formation and sporulation  
291 in *B. subtilis*<sup>46,47</sup>. However, our current understanding of the molecular basis of interactions between  
292 soil bacilli and pseudomonads is still rather limited. Here we show that the model species *B.*

293 *velezensis* can mobilize a substantial part of its secondary metabolome in response to  
294 *Pseudomonas* competitors. To our knowledge, it is the first evidence for enhanced synthesis of  
295 both broad-spectrum polyketides and RiPP in *Bacillus* upon a perception of other bacteria, in  
296 contact-independent *in vitro* settings and upon competitive root colonization. This correlates with an  
297 enhanced antibacterial potential which is of interest for biocontrol but which can also be considered  
298 as a defensive strategy to persist in its natural competitive niche. Upon sensing *Pseudomonas*, *B.*  
299 *velezensis* calls on its antibiotic arsenal but also recruits its surfactin lipopeptide to improve  
300 multicellular mobility. This may be viewed as an escape mechanism enabling *Bacillus* cells to  
301 relocate after detecting harmful challengers. Improved motility of *B. subtilis* has been already  
302 described upon sensing competitors such as *Streptomyces venezuelae*<sup>7,48</sup> but no relationship was  
303 established with enhanced production of BSMs potentially involved in the process. We also  
304 highlight a new role for surfactin acting as a chemical shield to counteract the toxicity of exogenous  
305 CLPs. Intraspecies CLP co-precipitation has been reported<sup>23</sup> but our results make sense of this  
306 phenomenon in the context of interference interaction between two different genera. *In planta*, this  
307 new function of surfactin contributes to *Bacillus* competitiveness for root invasion. This has to be  
308 added to other previously reported implications of surfactin in *B. subtilis* interspecies interactions,  
309 such as interfering with the growth of closely related species in synergy with cannibalism toxins<sup>49</sup>,  
310 inhibiting the development of *Streptomyces* aerial hyphae<sup>50</sup>, or participating in the expansion and  
311 motility of the interacting species<sup>47</sup>. We postulate that such *Bacillus* metabolite response largely  
312 contributes to mount a multi-faceted defensive strategy in order to gain fitness and persistence in  
313 its natural competitive niche.

314 Furthermore, we exemplify that PKs stimulation in *B. velezensis* is mainly mediated by the  
315 *Pseudomonas* secondary siderophore pyochelin, although it cannot be excluded that other  
316 secreted products may also play a role. *Bacillus* perceives pyochelin in a way independent of iron  
317 stress and piracy, indicating that beyond its iron-scavenging function, this siderophore may also act

318 as infochemical in interspecies cross-talk. In the pairwise system used here, E-PCH signaling  
319 superimposes the possible effect of iron limitation in the external medium which may also result in  
320 enhanced production of antibacterial metabolites by *Bacillus*, as occasionally reported<sup>51</sup>. That said,  
321 due to the limitation in bioavailable iron, almost all known rhizobacterial species have adapted to  
322 produce their iron-scavenging molecules to compete for this essential element<sup>52-54</sup>. Siderophore  
323 production is thus widely conserved among soil-borne bacteria<sup>55</sup>. It means that upon recognition of  
324 exogenous siderophores, any isolate may somehow identify surrounding competitors. However,  
325 some of these siderophores are structurally very variable and almost strain-specific (such as PVDs  
326 from fluorescent pseudomonads) while some others are much more widely distributed across  
327 species and even genera (enterobactin-like, citrate)<sup>52</sup>. In both cases, their recognition would not  
328 provide proper information about the producer because they are too specific or too general,  
329 respectively. Interestingly, the synthesis of E-PCH and its structurally very close enantio form is  
330 conserved in several but not all *Pseudomonas* sp.<sup>56-58</sup> as well as in a limited number of species  
331 belonging to other genera such as *Burkholderia*<sup>59</sup> and *Streptomyces*<sup>60,61</sup>. We therefore hypothesize  
332 that *Bacillus* may have evolved some chelator-sensing systems targeting siderophores that are  
333 conserved enough to be detected but restricted to specific microbial phylogenetic groups. With this  
334 mechanism, soil bacilli would rely on siderophores as public goods to accurately identify  
335 competitors and respond in an appropriate way like remodeling its BSM secretome. This novel  
336 concept of chelator sensing represents a new facet of siderophore-mediated social interactions.  
337 Whether it is used for other secondary siderophores than E-PCH and if so, whether this adaptative  
338 trait can be generalized to other soil-dwelling species deserves to be further investigated given its  
339 possible impact on soil bacterial ecology. Beyond the notion of specialized metabolites, we point  
340 out unsuspected functions for some bacterial small molecules in the context of interactions between  
341 clades that are important members of the plant-associated microbiome.

342

## 343 **Methods**

### 344 **Bacterial strains and growth conditions**

345 Strains and plasmids used in this study are listed in Supplementary Table 3. *B. velezensis* strains  
346 were grown at 30 °C on, half diluted, recomposed exudate solid medium (EM)<sup>22</sup> or in liquid EM with  
347 shaking (160 rpm). Deletion mutants of *B. velezensis* were selected on appropriate antibiotics  
348 (chloramphenicol at 5 µg/ml, phleomycin at 4 µg/ml, kanamycin at 25 µg/ml) on Lysogeny broth  
349 (LB) (10 g l<sup>-1</sup> NaCl, 5 g l<sup>-1</sup> yeast extract and 10 g l<sup>-1</sup> tryptone). *Pseudomonas* sp. strains were grown  
350 on King B (20 g l<sup>-1</sup> of bacteriological peptone, 10 g l<sup>-1</sup> of glycerol and 1.5 g l<sup>-1</sup> of K<sub>2</sub>HPO<sub>4</sub>, 1.5 g l<sup>-1</sup> of  
351 MgSO<sub>4</sub>·7H<sub>2</sub>O, pH = 7) and casamino acid (CAA) solid and liquid medium (10 g l<sup>-1</sup> casamino acid,  
352 0.3 g l<sup>-1</sup> K<sub>2</sub>HPO<sub>4</sub>, 0.5 g l<sup>-1</sup> MgSO<sub>4</sub> and pH = 7) with shaking (120 rpm), at 30 °C. The  
353 phytopathogenic bacterial strains were grown on LB and EM solid and liquid media and with  
354 shaking (150 rpm), at 30 °C.

### 355 **Construction of deletion mutants of *B. velezensis* GA1**

356 All deletion mutants were constructed by marker replacement. Briefly, 1 kb of the upstream region  
357 of the targeted gene, an antibiotic marker (chloramphenicol, phleomycin or kanamycin cassette)  
358 and downstream region of the targeted gene were PCR amplified with specific primers  
359 (Supplementary Table 3). The three DNA fragments were linked by overlap PCR to obtain a DNA  
360 fragment containing the antibiotic marker flanked by the two homologous recombination regions.  
361 This latter fragment was introduced into *B. velezensis* GA1 by natural competence induced by  
362 nitrogen limitation<sup>62</sup>. Homologous recombination event was selected by chloramphenicol resistance  
363 (phleomycin resistance for double mutants or kanamycin resistance for triple mutants) on LB  
364 medium. All gene deletions were confirmed by PCR analysis with the corresponding UpF and DwR  
365 specific primers and by the loss of the corresponding BSMs production.



366 Transformation of the *B. velezensis* GA1 strain was performed following the protocol  
367 previously described<sup>62</sup> with some modifications. One fresh GA1 colony was inoculated into LB liquid  
368 medium at 37 °C (160 rpm) until reaching an OD<sub>600nm</sub> of 1.0. Afterwards, cells were washed one  
369 time with peptone water and one time with a modified Spizizen minimal salt liquid medium (MMG)  
370 (19 g l<sup>-1</sup> K<sub>2</sub>HPO<sub>4</sub> anhydrous; 6 g l<sup>-1</sup> KH<sub>2</sub>PO<sub>4</sub>; 1 g l<sup>-1</sup> Na<sub>3</sub> citrate anhydrous; 0.2 g l<sup>-1</sup> MgSO<sub>4</sub> 7H<sub>2</sub>O; 2 g  
371 l<sup>-1</sup> Na<sub>2</sub>SO<sub>4</sub>; 50 µM FeCl<sub>3</sub> (sterilized by filtration at 0.22 µm); 2 µM MnSO<sub>4</sub>; 8 g l<sup>-1</sup> glucose; 2 g l<sup>-1</sup> L-  
372 glutamic acid; pH 7.0), 1 µg of DNA recombinant fragment was added to the GA1 cells suspension  
373 adjusted to an OD<sub>600nm</sub> of 0.01 into MMG liquid medium. One day after incubation at 37 °C with  
374 shaking at 165 rpm, bacteria were spread on LB plates supplemented with the appropriate  
375 antibiotic to select positive colonies.

#### 376 **Construction of deletion mutants of *Pseudomonas* sp. CMR12a**

377 E-PCH and PVD mutants of *Pseudomonas* sp. CMR12a were constructed using the I-SceI system  
378 and the pEMG suicid vector<sup>63,64</sup>. Briefly, the upstream and downstream region flanking the *pchA*  
379 (*C4K39\_5481*) or the *pvdI* (*C4K39\_6027*) genes were PCR amplified (primers listed in the  
380 Supplementary Table 3), linked via overlap PCR and inserted into the pEMG vector. The resulting  
381 plasmid (Supplementary Table 3) was integrated by conjugation into the *Pseudomonas* sp.  
382 CMR12a chromosome via homologous recombination. Kanamycin (25µg/mL) resistant cells were  
383 selected on King B agar plates and transformed by electroporation with the pSW-2 plasmid  
384 (harboring I-SceI system). Gentamycin (20µg/ml) resistant colonies on agar plates were transferred  
385 to King B medium with and without kanamycin to verify the loss of the antibiotic (kanamycin)  
386 resistance. *Pseudomonas* mutants were identified by PCR with the corresponding UpF and DwR  
387 specific primers and via the loss of E-PCH or/and PVD production (see section Secondary  
388 metabolites analysis).

#### 389 ***Pseudomonas* sp. cell-free supernatant**



390 *Pseudomonas* sp. strains were grown overnight on LB solid medium, at 30 °C. The cell suspension  
391 was adjusted to OD<sub>600nm</sub> 0.05 by resuspension in 100 ml of CAA and when appropriate  
392 supplemented with 20 µg/l of FeCl<sub>3</sub>.6H<sub>2</sub>O (iron supplementation). Cultures were shaken at 120 rpm  
393 at 30 °C for 48 h and then centrifuged at 5000 rpm at room temperature (22 °C) for 20 min. The  
394 supernatant was filter-sterilized (0.22 µm pore size filters) and stored at -20 °C until use.

### 395 **Dual interactions**

396 *B. velezensis* strains were grown overnight on LB solid medium, at 30 °C. Cells were resuspended  
397 in 2 ml of EM liquid medium to a final OD<sub>600nm</sub> of 0.1 in which 1, 2, or 4% v/v (depending on the  
398 experiment and indicated in the figures legends) of *Pseudomonas* CFS were added while the  
399 control remained un-supplemented. *B. velezensis* liquid cultures were shaken in an incubator at  
400 300 rpm at 30 °C for 24 h. Additionally, 2 ml of the (co-)culture supernatants were sampled at 8 h  
401 and 24 h, centrifuged at 5000 rpm at room temperature (approx. 22 °C) for 10 min to extract  
402 supernatants and collect the cells. Further, cell-free (co-)culture supernatants were filter-sterilized  
403 (0.22µm) and used for analytical analysis of secondary metabolites and antibacterial assays. For  
404 some experiments using 2H-bae as a marker, the CFS obtained from the double mutant sessilins  
405 and orfamides ( $\Delta$ *sesA-ofaBC*) was used instead of CFS from CMR12a wild-type because it yielded  
406 a higher response and lower inhibition interferences by CLPs. The remaining cells, after  
407 supernatant collection, were stored at -80 °C to avoid RNA degradation, until performing RT-qPCR  
408 analysis.

### 409 **Antimicrobial activity assays**

410 Antibacterial activity of the *B. velezensis* supernatant generated after dual interaction with  
411 *Pseudomonas* CFS was tested against *X. campestris* pv. *campestris* and *C. michiganensis* subsp.  
412 *michiganensis*. The activity of co-culture supernatants was quantified in microtiter plates (96-well)

413 filled with 250  $\mu$ l of LB liquid medium, inoculated at  $OD_{600nm} = 0.1$  with *X. campestris* pv. *campestris*  
414 and *C. michiganensis* subsp. *michiganensis* and supplemented with 2% or 6% v/v of the  
415 supernatants, respectively. The activity of (co-)culture supernatants was estimated by measuring  
416 the pathogen  $OD_{600nm}$  every 30min during 24 h with a Spectramax® (Molecular Devices,  
417 Wokingham, UK), continuously shaken, at 30 °C. For estimating the activity of co-culture  
418 supernatants on a solid medium, 5  $\mu$ l supernatant was applied to a sterile paper disk (5 mm  
419 diameter). After drying, disks were placed on LBA square plates previously inoculated with a  
420 confluent layer of *X. campestris* pv. *campestris*, *C. michiganensis* subsp. *michiganensis*, *P.*  
421 *carotovorum*, *P. fuscovaginae*, *P. cichorii*, *A. tumefaciens* or *R. fascians*. LB liquid medium was  
422 used as a negative control. Plates were incubated at 25 °C for 48 h. Three repetitions were done  
423 and the inhibition zones from the edge of the paper discs to the edge of the zone were measured.  
424 Antibacterial activity of the different *Pseudomonas* strains on the *B. velezensis* strains growth were  
425 tested by adding different % (v/v) of the corresponding *Pseudomonas* CFS in microtiter plates (96-  
426 well) filled with 250  $\mu$ l of EM liquid medium. *B. velezensis*  $OD_{600nm}$  after 7 h was measured with a  
427 Spectramax® (Molecular Devices, Wokingham, UK).

#### 428 **RNA isolation and RT-qPCR**

429 RNA extraction and DNase treatment were carried out using the NucleoSpin RNA Kit (Macherey  
430 Nagel, Germany), following the Gram + manufacturer's protocol. RNA quality and quantity were  
431 performed with Thermo scientific NanoDrop 2000 UV-vis Spectrophotometer. Primer 3 program  
432 available online was used for primer design and primers were synthesized by Eurogentec. The  
433 primer efficiency was evaluated and primer pairs showing an efficiency between 90 and 110% in  
434 the qPCR analysis were selected. Reverse transcriptase and RT-qPCR reactions were conducted  
435 using the Luna® Universal One-Step RT-qPCR Kit (New England Biolabs, Ipswich, MA, United  
436 States). The reaction was performed with 50 ng of total RNA in a total volume of 20  $\mu$ L: 10  $\mu$ L of

437 luna universal reaction mix, 0.8  $\mu$ L of each primer (10  $\mu$ M), 5  $\mu$ L of cDNA (50ng), 1  $\mu$ L of RT  
438 Enzyme MIX, 2.4  $\mu$ l of Nuclease-free water. The thermal cycling program applied on the ABI  
439 StepOne was: 55  $^{\circ}$ C for 10 min, 95  $^{\circ}$ C for 1 min, 40 cycles of 95  $^{\circ}$ C for 10 s and 60  $^{\circ}$ C for 1 min,  
440 followed by a melting curve analysis performed using the default program of the ABI StepOne  
441 qPCR machine (Applied Biosystems). The real-time PCR amplification was run on the ABI step-one  
442 qPCR instrument (Applied Biosystems) with software version 2.3. The relative gene expression  
443 analysis was conducted by using the  $2\Delta Ct$  method<sup>65</sup> with the *gyrA* gene as a housekeeping gene to  
444 normalize mRNA levels between different samples. The target genes in this study were *dfnA*, *baeJ*  
445 and *acnA*.

#### 446 **Secondary metabolite analysis**

447 For detection of BSMs, *B. velezensis* and *Pseudomonas* sp. were cultured in EM and CAA as  
448 described above. After an incubation period of 24 h for *B. velezensis*, if not differentially indicated,  
449 and 48 h for *Pseudomonas* sp., supernatants of the bacteria were collected and analyzed by UPLC  
450 MS and UPLC qTOF MS/MS. Metabolites were identified using Agilent 1290 Infinity II coupled with  
451 DAD detector and Mass detector (Jet Stream ESI-Q-TOF 6530) in both negative and positive mode  
452 with the parameter set up as follows: parameters: capillary voltage: 3.5 kV; nebulizer pressure: 35  
453 psi; drying gas: 8 l/min; drying gas temperature: 300  $^{\circ}$ C; flow rate of sheath gas: 11 l/min; sheath  
454 gas temperature: 350  $^{\circ}$ C; fragmentor voltage: 175 V; skimmer voltage: 65 V; octopole RF: 750 V.  
455 Accurate mass spectra were recorded in the range of  $m/z$  = 40-250. An C18 Acquity UPLC BEH  
456 column (2.1  $\times$  50 mm  $\times$  1.7  $\mu$ m; Waters, milford, MA, USA) was used at a flow rate of 0.3 ml/min  
457 and a temperature of 40  $^{\circ}$ C. The injection volume was 20  $\mu$ l and the diode array detector (DAD)  
458 scanned a wavelength spectrum between 190 and 600 nm. A gradient of 0.1% formic acid water  
459 (solvent A) and acetonitrile acidified with 0.1% formic acid (solvent B) was used as a mobile phase  
460 with a constant flow rate at 0.45 ml/min starting at 10% B and raising to 100% B in 20 min. Solvent

461 B was kept at 100% for 2 min before going back to the initial ratio. Secondary metabolite  
462 quantification was performed by using UPLC–MS with UPLC (Acquity H-class, Waters) coupled to  
463 a single quadrupole mass spectrometer (SQD mass analyzer, Waters) using a C18 column  
464 (Acquity UPLC BEH C18 2.1 mm × 50 mm, 1.7 μm). Elution was performed at 40 °C with a  
465 constant flow rate of 0.6 ml/min using a gradient of Acetonitrile (solvent B) and water (solvent A)  
466 both acidified with 0.1% formic acid as follows: 2 min at 15% B followed by a gradient from 15% to  
467 95% during 5 min and maintained at 95% up to 9.5 min before going back to initial conditions at 10  
468 min during 2 min before next injection. Compounds were detected in both electrospray positive and  
469 negative ion mode by setting SQD parameters as follows: cone voltage: 60V; source temperature  
470 130 °C; desolvation temperature 400 °C, and nitrogen flow: 1000 l/h with a mass range from m/z  
471 300 to 2048. 3D chromatograms were generated using the open-source software MzMine 2<sup>66</sup>.

#### 472 **Bioguided fractionation**

473 *Pseudomonas* CFS were concentrated with a C18 cartridge ‘Chromafix, small’ (Macherey-Nagel,  
474 Düren, Germany). The column was conditioned with 10 ml of MeOH followed by 10 ml of milliQ  
475 water. Then, 20 ml of supernatant flowed through the column. The metabolites were eluted with 1  
476 ml of a solution of increasing acetonitrile/water ratio from 5:95 to 100:0 (v/v). The triggering effect of  
477 these fractions on *Bacillus* 2H-bae production was tested in 48 wells microplate containing 1 ml of  
478 EM medium inoculated with *B. velezensis* GA1 (OD<sub>600nm</sub> = 0.1) and 4% v/v of aforementioned  
479 *Pseudomonas* fractions, growing for 24 h, with shaking at 300 rpm and 30 °C. Afterward, the  
480 production of 2H-bae was quantified compared to controls and crude supernatant.

#### 481 **Purification of E-PCH and PVD**

482 PVD and E-PCH were purified in two steps. Firstly, *Pseudomonas* CFS were concentrated with a  
483 C18 cartridge (as indicated in section Bioguided fractionation) and eluted with 2 times 2 ml of a

484 solution of water and ACN (15 and 30% of ACN (v/v)). Secondly, the fractions were injected on  
485 HPLC for purification performed on an Eclipse+ C18 column (L = 150 mm, D = 3.0 mm, Particles  
486 diameter 5  $\mu\text{m}$ ) (Agilent, Waldbronn, Germany). The volume injected was 100  $\mu\text{l}$ . The UV-Vis  
487 absorbance was measured with a VWD Agilent technologies 1100 series (G1314A) detector  
488 (Agilent, Waldbronn, Germany). The lamp used was a Deuterium lamp G1314 Var Wavelength Det.  
489 (Agilent, Waldbronn, Germany). Two wavelengths were selected: 320 nm, used for the detection of  
490 E-PCH, and 380 nm, used for the detection of PVD. The fractions containing the PVD and E-PCH  
491 were collected directly at the detector output. Further, the purity of the samples was verified by two  
492 detectors, a diode array detector (DAD) 190 to 601 nm (steps: 1 nm) and a Q-TOF (tandem mass  
493 spectrometry, quadrupole and Time of flight detector combined) (Agilent, Waldbronn, Germany).  
494 Electrospray ionization was performed in positive mode (ESI+) (Dual AJS ESI) ( $V_{\text{cap}} = 3500 \text{ V}$ ,  
495 Nozzle Voltage = 1000 V), with a mass range from  $m/z$  200 to 1500. Finally, the concentration of  
496 PVD and E-PCH were estimated by utilization of Beer-Lambert law formula,  $A = \epsilon lc$  ( $A$ :  
497 absorbance;  $\epsilon$ : molar attenuation coefficient or absorptivity of the attenuating species;  $l$ : optical  
498 path length and  $c$ : concentration of molecule).  $l$  value for E-PCH and PVD is 1 cm while  $\epsilon$  is 4000  
499  $\text{L}\cdot\text{mol}^{-1}\cdot\text{cm}^{-1}$  or 16000  $\text{L}\cdot\text{mol}^{-1}\cdot\text{cm}^{-1}$ , respectively<sup>67</sup>. The absorbance was measured with VWR, V-  
500 1200 Spectrophotometer, at 320 nm (pH = 8) for E-PCH and 380nm (pH = 5 ) for PVD<sup>67</sup>. Further,  
501 the absorbance value was used for calculating the final concentration. The fragmentation pattern of  
502 *Pseudomonas* sp. CMR12a PVD was obtained by UPLC MS/MS analysis of  $m/z = 1288.5913$  ion in  
503 positive mode with fragmentation energy at 75 V and compared to the one described in *P.*  
504 *protegens* Pf-5<sup>40</sup>.

#### 505 **Confrontation, white line formation and motility test**

506 For confrontation assays on agar plates, *Bacillus* and *Pseudomonas* strains were grown overnight  
507 in EM and CAA liquid mediums, respectively. After bacterial washing in peptone water and

508 adjustment of OD<sub>600nm</sub> to 0.1, 5 µl of bacterial suspension was spotted at 1 mm, 5 mm and 7.5 mm  
509 distance onto an EM agar plate. For the white line formation experiments, *B. velezensis* line was  
510 applied with a cotton stick and 5 µl of *Pseudomonas* sp. cell suspensions were spotted at a 5 mm  
511 distance onto CAA agar plates. Plates were incubated at 30 °C and images taken after 24 h.  
512 Photographs were captured using CoolPix camera (NiiKKOR 60x WIDE OPTICAL ZOOM EDVR  
513 4.3-258 mm 1:33-6.5).

#### 514 **MALDI-FT-ICR MS imaging**

515 Mass spectrometry images were obtained as recently described<sup>68</sup> using a FT-ICR mass  
516 spectrometer (SolariX XR 9.4T, (Bruker Daltonics, Bremen, Germany)) mass calibrated from 200  
517 m/z to 2,300 m/z to reach a mass accuracy of 0.5 ppm. Region of interest from agar microbial  
518 colonies was directly collected from the Petri dish and transferred onto an ITO Glass slide (Bruker,  
519 Bremen, Germany), previously covered with double-sided conductive carbon tape. The samples  
520 were dried under vacuum and covered with an α-cyano-4-hydroxycinnamic acid (HCCA) matrix  
521 solution at 5 mg/mL (70 : 30 acetonitrile : water v/v). In total, 60 layers of HCCA matrix were  
522 sprayed using the SunCollect instrument (SunChrom, Friedrichsdorf, Germany). FlexImaging 5.0  
523 (Bruker Daltonics, Bremen, Germany) software was used for MALDI-FT-ICR MS imaging  
524 acquisition, with a pixel step size for the surface raster set to 100 µm.

#### 525 ***In planta* competition**

526 For *in planta* studies, tomato seeds (*Solanum lycopersicum* var. MoneyMaker) were sterilized in  
527 75% ethanol with shaking for 2 min. Subsequently, ethanol was removed and seeds were added to  
528 the 50 ml sterilization solution (8.5 ml of 15% bleach, 0.01 g of Tween 80 and 41.5 ml of sterile  
529 ultra-pure water) and shaken for 10 min. Seeds were thereafter washed five times with water to  
530 eliminate stock solution residues. Further, seeds were placed on square Petri dishes (5

531 seeds/plate) containing Hoagland solid medium (14 g/l agar, 5 ml stock 1 (EDTA 5,20 mg/l;  
532 FeSO<sub>4</sub>x7H<sub>2</sub>O 3,90 mg/l; H<sub>3</sub>B<sub>0</sub><sub>3</sub> 1,40 mg/l; MgSO<sub>4</sub>x7H<sub>2</sub>O 513 mg/l; MnCl<sub>2</sub>x4H<sub>2</sub>O 0,90 mg/l,  
533 ZnSO<sub>4</sub>x7H<sub>2</sub>O 0,10 mg/l; CuSO<sub>4</sub>x5H<sub>2</sub>O 0,05 mg/l; 1 ml in 50 ml stock 1, NaMoO<sub>4</sub>x2H<sub>2</sub>O 0,02 mg/l 1  
534 ml in 50 ml stock 1), 5 ml stock 2 (KH<sub>2</sub>PO<sub>4</sub> 170 mg/l; 5 ml stock 3: KNO<sub>3</sub> 316 mg/l, Ca(NO<sub>3</sub>)<sub>2</sub> 4H<sub>2</sub>O  
535 825 mg/l), pH = 6,5) and placed in the dark for three days. Afterwards, 10 seeds were inoculated  
536 with 2 µl of overnight culture (OD<sub>600</sub> = 0.1) of the appropriate strains (control) or with a mix of  
537 *Bacillus* and *Pseudomonas* cells (95:5 ration) (interaction) and grown at 22 °C under a 16/8 h  
538 night/day cycle with constant light for three days. After the incubation period, to determine bacterial  
539 colonization levels, bacteria from roots of six plants per condition were detached from roots by  
540 vortexing for 1 min in peptone water solution supplemented with 0.1% of Tween. Serial dilutions  
541 were prepared and 200 µl of each were plated onto LB medium using plating beads. After 24 h of  
542 incubation at 30 °C for *Pseudomonas* and at 42 °C for *Bacillus*, colonies were counted.  
543 Colonization results (six plants per strain) were log-transformed and statistically analyzed. Three  
544 independent assays were performed with six plants each for *in planta* competition assays. To  
545 measure bacterial BSMs production *in planta*, a rectangle part (1 x 2.5 cm) of medium close to the  
546 tomato roots was sampled. BSMs were extracted for 15 min, with 1.5 ml of acetonitrile (85%). After  
547 centrifugation for 5 min at 4000 rpm, the supernatant was recovered for UPLC-MS analysis as  
548 previously described.

## 549 **Statistical analysis**

550 Statistical analyses were performed using GraphPad PRISM software with Student paired T-test or  
551 Mann-Whitney test. For multiple comparisons, one-way ANOVA and Tukey tests were used in  
552 RStudio 1.1.423 statistical software environment (R language version 4.03)<sup>69</sup>.

553



## 554 **Figure legends**

555 **Figure 1. Stimulation of BSMs production by *B. velezensis* GA1 and enhanced anti-bacterial**  
556 **activities in response to *Pseudomonas* sp. CMR12a secreted metabolites. a.** UPLC-MS  
557 extracted ions chromatograms (EIC) illustrating the relative abundance of ions corresponding to  
558 non-ribosomal metabolites produced by *B. velezensis* GA1 in CFS-supplemented (2% v/v) EM  
559 medium (blue) compared to un-supplemented cultures used as control (red). Red-coloured parts in  
560 the representation of lipopeptides and macrolactin illustrate the variable structural traits explaining  
561 the occurrence of naturally co-produced variants (multiple peaks) **b.** Fold increase in GA1 BSM  
562 production upon addition of CMR12a CFS (2% v/v) compared to un-supplemented cultures (fold  
563 change = 1, red line). Data were calculated based on the relative quantification of the compounds  
564 by UPLC-MS (peak area) in both conditions. Mean values were calculated from data obtained in  
565 three cultures (repeats) from two independent experiments (n = 6). Statistical significance was  
566 calculated using Mann–Whitney test where ‘\*\*\*\*\*’ represents significant difference at  $P < 0.0001$ . **c.**  
567 Enhanced Anti-*Xanthomonas campestris* (I and II) and anti-*Clavibacter michiganensis* (III and IV)  
568 activities of GA1 extracts (cell-free culture supernatant) after growth in CMR12a CFS-  
569 supplemented medium (GA1+CFS) compared to control (GA1). It was assessed both on plates by  
570 the increase in inhibition zone around paper disc soaked with 5  $\mu$ l the GA1 extracts (I and III) and in  
571 liquid cultures of the pathogens by reduction of growth upon addition of 4% (v/v) of GA1 extracts (II  
572 and IV). Data are from one representative experiment and similar results were obtained in two  
573 independent replicates. **d.** Antibacterial activities of extracts from GA1 WT and mutants impaired in  
574 production of specific BSMs. Metabolites not produced by the different mutants are illustrated with  
575 red boxes in the table below. All values represent means with error bars indicating SD calculated  
576 on data from three cultures (repeats) in two independent experiments (n = 6). Letters a to d indicate  
577 statistically significant differences according to one-way analysis of variance (ANOVA) and Tukey’s  
578 HSD test (Honestly significantly different,  $\alpha = 0.05$ ). **e.** Differential expression of the *acnA* gene



579 encoding the amylocylin precursor, upon supplementation with CMR12a CFS compared to GA1  
580 un-supplemented culture. Mean and SD values,  $n = 6$ , “\*\*\*” indicates statistical significance  
581 according to Mann–Whitney test,  $P < 0.01$ .

582

583 **Figure 2: E-PCH as main *Pseudomonas* trigger of anti-bacterial activity boosted in *B.***  
584 ***velezensis* GA1. a**, Effect of GA1 culture supplementation with CFS (2% v/v) from CMR12a WT  
585 and various mutants on dihydrobacillaene (2H-bae) production. Metabolites specifically repressed  
586 in the different CMR12a mutants are illustrated by red boxes. Fold changes were calculated based  
587 on relative quantification of the compounds by UPLC-MS (peak area) in treated cultures compared  
588 to un-supplemented controls (fold change = 1, red line). Data are means and SE calculated from  
589 three replicate cultures in two ( $n = 6$ ) or three ( $n = 9$ ) independent experiments and different letters  
590 indicate statistically significant differences (ANOVA and Tukey’s test,  $\alpha = 0.05$ ). **b**, Differential  
591 production of 2H-bae after addition of 0.35  $\mu\text{M}$  pure PVD, 1.4  $\mu\text{M}$  pure E-PCH, 4% v/v  
592 *Pseudomonas* sp. CMR12a CFS (CFS CAA), CMR12a CFS from iron supplemented culture (CFS  
593 CAA+Fe) and different concentration of the iron-chelating agent 2,2'-dipyridyl (DIP). Data are  
594 expressed and were statistically treated as described in **a** with  $n = 6$  in all treatments. **c**, Dose-  
595 dependent effect of pure PVD and E-PCH on bacillibactin and 2H-bae production. GA1 cultures  
596 were supplemented with the indicated concentrations of HPLC-purified CMR12a siderophores.  
597 Experiments were replicated and data statistically processed as described in **b**. **d**, Impact of the  
598 addition of pure PVD and E-PCH on the growth of GA1 WT and its  $\Delta dhbC$  mutant repressed in  
599 bacillibactin synthesis. *Pseudomonas* siderophores were added at a final concentration similar to  
600 the one obtained by adding CMR12a CFS at 4% v/v. Means and SD are from three replicates. See  
601 Supplementary Figure 8 for detailed data and statistical significance.

602

603 **Figure 3: Distance- and surfactin-dependent enhanced motility of *B. velezensis* GA1 in**  
604 **interaction with *Pseudomonas* CMR12a. a,** GA1 motility phenotype on EM gelified medium when  
605 cultured alone (left panel) or in confrontation with CMR12a at a short distance (1 cm) (right panel).  
606 **b,** Motility pattern of GA1 or his  $\Delta srfaA$  surfactin deficient mutant in confrontation with CMR12a at a  
607 short distance. **c,** MALDI FT-ICR MSI (Mass spectrometry Imaging) heatmaps showing spatial  
608 localization and relative abundance of ions ( $[M+Na]^+$ ) corresponding to the  $C_{14}$  surfactin homolog  
609 (most abundant) when *B. velezensis* GA1 is in confrontation with CMR12a at increasing distances  
610 (one biological replicate).

611

612 **Figure 4: Surfactin attenuates sessilin-mediated toxicity via white-line formation. a, I.**  
613 Polarized inhibition of GA1 micro-colony development upon co-cultivation at close contact with  
614 CMR12a colonies on EM plates. **II.** Inhibition of GA1 cell growth in EM liquid culture supplemented  
615 with 6% v/v of CFS prepared from CMR12a wild-type or mutants repressed in the synthesis of  
616 orfamides and phenazines ( $\Delta ofaBC-phz$ ), sessilins ( $\Delta sesA$ ), sessilins and orfamides ( $\Delta sesA-$   
617  $ofaBC$ ), sessilins and phenazines ( $\Delta sesA-phz$ ), or of all compounds ( $\Delta sesA-ofaBC-phz$ ). Data show  
618 mean and SD calculated from two independent experiments each with three culture replicates ( $n =$   
619 6) and different letters indicate statistically significant differences (ANOVA and Tukey's test,  $\alpha =$   
620 0.05). **b,** Growth inhibition of GA1 WT and  $\Delta srfaA$  mutant upon delayed supplementation (added 6  
621 h after incubation start) with CFS from CMR12a WT alone or together with pure surfactin as  
622 chemical complementation) and with CFS from the sessilin mutant ( $\Delta sesA$ ). Un-supplemented  
623 cultures of GA1 were used as control. Experiments were replicated and data statistically processed  
624 as described in **a. c,** White line formation and/or *Bacillus* inhibition observed upon confrontation of  
625 GA1 WT or the surfactin mutant  $\Delta srfaA$  with (I) CMR12a or its  $\Delta sesA$  derivative, (II) *P. tolaasii*  
626 CH36 or its tolaasin defective mutant  $\Delta toIA$  and (III) other *Pseudomonas* CLP producers WCU-84,

627 SS101, BW11M1, RW10S2. CLPs produced by the individual *Pseudomonas* strains are mentioned  
628 in the chart below. **d**, 3D representation of UPLC-MS analysis of CLPs that are present in the  
629 white-line zone between GA1 and CMR12a (I). It shows the specific accumulation of sessilin and  
630 surfactin molecular ions (one biological replicate).

631

632 **Figure 5: Competitive colonization assays support the roles of BSMs in *Bacillus-***  
633 ***Pseudomonas* interaction in planta.** **a**, GA1 and CMR12a cell populations as recovered from  
634 roots at 3 days post-inoculation (dpi) of tomato plantlets when inoculated alone (GA1, CMR12a) or  
635 co-inoculated (co-inoculation). Box plots were generated based on data from three independent  
636 assays each involving at least 4 plants per treatment (n=16). The whiskers extend to the minimum  
637 and maximum values, and the midline indicates the median. Statistical differences between the  
638 treatments were calculated using Mann–Whitney test and “\*\*\*\*” and “\*\*\*\*\*” represent significant  
639 differences at  $P<0.0001$  and  $P<0.001$ , respectively. **b**, *In planta* (3 dpi on tomato roots) relative  
640 expression of the *dfnA*, *baeJ* and *acnA* genes responsible for the synthesis of respectively  
641 (oxy)difficidin, 2H-bae and amylocyclicin. Graphs show the mean and SD calculated from three  
642 biological replicates (n = 3) each involving six plants. Fold change = 1 as red line corresponds to  
643 gene expressions in GA1 inoculated alone on roots used as control conditions. Statistical  
644 comparison between data in co-colonization setting and control conditions was performed based on  
645 T-test (\*,  $P<0.05$ ; \*\*,  $P<0.01$ ; \*\*\*,  $P<0.001$ ; \*\*\*\*,  $P<0.0001$ ). **c**. UPLC-MS EIC illustrating relative *in*  
646 *planta* production of sessilins and surfactins by monocultures of *B. velezensis* GA1 (GA1) and co-  
647 cultures of wild-types (GA1+CMR12a) and *B. velezensis* GA1 and *Pseudomonas* sp. CMR12a  
648 impaired in sessilins production (GA1+ $\Delta$ sesA). **d**, Cell populations recovered at 3 dpi for GA1 WT  
649 (GA1) or the surfactins impaired mutant ( $\Delta$ srfaA) co-inoculated with CMR12a WT (CMR12a) or its  
650 sessilins KO mutant ( $\Delta$ sesA). See **a** for replicates and statistics (\*\*,  $P<0.01$ ).

651

## 652 **References**

- 653 1. Nayfach, S. *et al.* A genomic catalog of Earth's microbiomes. *Nat. Biotechnol.* (2020)  
654 doi:10.1038/s41587-020-0718-6.
- 655 2. Fierer, N. Embracing the unknown: disentangling the complexities of the soil microbiome.  
656 *Nat. Rev. Microbiol.* **15**, 579–590 (2017).
- 657 3. Schmidt, R., Ulanova, D., Wick, L. Y., Bode, H. B. & Garbeva, P. Microbe-driven chemical  
658 ecology: past, present and future. *ISME Journal*.**13**, 2656–2663 (2019).
- 659 4. Tyc, O., Song, C., Dickschat, J. S., Vos, M. & Garbeva, P. The ecological role of volatile and  
660 soluble secondary metabolites produced by soil bacteria. *Trends Microbiol.* **25**, 280–292  
661 (2017).
- 662 5. Bernal, P., Llamas, M. A. & Filloux, A. Type VI secretion systems in plant-associated  
663 bacteria. *Environ. Microbiol.* **20**, 1–15 (2018).
- 664 6. Abreu, N. A. & Taga, M. E. Decoding molecular interactions in microbial communities.  
665 *FEMS Microbiol. Rev.* **40**, 648–663 (2016).
- 666 7. Andrić, S., Meyer, T. & Ongena, M. *Bacillus* responses to plant-associated fungal and  
667 bacterial communities. *Front. Microbiol.* **11**, (2020).
- 668 8. Mendes, R., Garbeva, P. & Raaijmakers, J. M. The rhizosphere microbiome: significance of  
669 plant beneficial, plant pathogenic, and human pathogenic microorganisms. *FEMS Microbiol.*  
670 *Rev.* **37**, 634–663 (2013).
- 671 9. Müller, D. B., Vogel, C., Bai, Y. & Vorholt, J. A. The plant microbiota: systems-level insights  
672 and perspectives. *Annu. Rev. Genet.* **50**, 211–234 (2016).
- 673 10. Penha, R. O., Vandenberghe, L. P. S., Faulds, C., Socol, V. T. & Socol, C. R. *Bacillus*  
674 lipopeptides as powerful pest control agents for a more sustainable and healthy agriculture:

- 675 recent studies and innovations. *Planta* **251**, 1–15 (2020).
- 676 11. Grubbs, K. J. *et al.* Large-Scale bioinformatics analysis of *Bacillus* genomes uncovers  
677 conserved roles of natural products in bacterial physiology. *mSystems* **2**, 1–18 (2017).
- 678 12. Harwood, C. R., Mouillon, J.-M. M., Pohl, S. & Arnau, J. Secondary metabolite production  
679 and the safety of industrially important members of the *Bacillus subtilis* group. *FEMS*  
680 *Microbiol. Rev.* **42**, 721–738 (2018).
- 681 13. Ye, M. *et al.* Characteristics and application of a novel species of *Bacillus*: *Bacillus*  
682 *velezensis*. *ACS Chem. Biol.* **13**, 500–505 (2018).
- 683 14. Rabbee, M. *et al.* *Bacillus velezensis*: A valuable member of bioactive molecules within plant  
684 microbiomes. *Molecules* **24**, 1–13 (2019).
- 685 15. Pieterse, C. M. J. *et al.* Induced systemic resistance by beneficial microbes. *Annu. Rev.*  
686 *Phytopathol.* **52**, 347–375 (2014).
- 687 16. Köhl, J., Kolnaar, R. & Ravensberg, W. J. Mode of action of microbial biological control  
688 agents against plant diseases: relevance beyond efficacy. *Front. Plant Sci.* **10**, 845 (2019).
- 689 17. Traxler, M. F. & Kolter, R. Natural products in soil microbe interactions and evolution. *Nat.*  
690 *Prod. Rep.* **32**, 956–970 (2015).
- 691 18. Raaijmakers, J. M. & Mazzola, M. Diversity and natural functions of antibiotics produced by  
692 beneficial and plant pathogenic bacteria. *Annu. Rev. Phytopathol.* **50**, 403–424 (2012).
- 693 19. Li, Y. & Rebuffat, S. The manifold roles of microbial ribosomal peptide-based natural  
694 products in physiology and ecology. *J. Biol. Chem.* **295**, 34–54 (2020).
- 695 20. Raaijmakers, J. M., de Bruijn, I., Nybroe, O. & Ongena, M. Natural functions of lipopeptides  
696 from *Bacillus* and *Pseudomonas*: More than surfactants and antibiotics. *FEMS Microbiol.*  
697 *Rev.* **34**, 1037–1062 (2010).
- 698 21. Blin, K. *et al.* antiSMASH 5.0: updates to the secondary metabolite genome mining pipeline.  
699 *Nucleic Acids Res.* **47**, W81–W87 (2019).

- 700 22. Nihorimbere, V. *et al.* Impact of rhizosphere factors on cyclic lipopeptide signature from the  
701 plant beneficial strain *Bacillus amyloliquefaciens* S499. *FEMS Microbiol. Ecol.* **79**, 176–191  
702 (2012).
- 703 23. D’aes, J. *et al.* To settle or to move? The interplay between two classes of cyclic lipopeptides  
704 in the biocontrol strain *Pseudomonas* CMR12a. *Environ. Microbiol.* **16**, 2282–2300 (2014).
- 705 24. Hua, G. K. H. & Höfte, M. The involvement of phenazines and cyclic lipopeptide sessilin in  
706 biocontrol of *Rhizoctonia* root rot on bean (*Phaseolus vulgaris*) by *Pseudomonas* sp.  
707 CMR12a is influenced by substrate composition. *Plant Soil* **388**, 243–253 (2015).
- 708 25. Perneel, M. *et al.* Characterization of CMR5c and CMR12a, novel fluorescent *Pseudomonas*  
709 strains from the cocoyam rhizosphere with biocontrol activity. *J. Appl. Microbiol.* **103**, 1007–  
710 1020 (2007).
- 711 26. Olorunleke, F. E. *et al.* Coregulation of the cyclic lipopeptides orfamide and sessilin in the  
712 biocontrol strain *Pseudomonas* sp. CMR12a. *Microbiologyopen* **6**, 1–12 (2017).
- 713 27. Olorunleke, F. E., Hua, G. K. H., Kieu, N. P., Ma, Z. & Höfte, M. Interplay between  
714 orfamides, sessilins and phenazines in the control of *Rhizoctonia* diseases by *Pseudomonas*  
715 sp. CMR12a. *Environ. Microbiol. Rep.* **7**, 774–781 (2015).
- 716 28. Geudens, N. & Martins, J. C. Cyclic lipodepsipeptides from *Pseudomonas* spp. - Biological  
717 Swiss-Army knives. *Front. Microbiol.* **9**, 1–18 (2018).
- 718 29. Omoboye, O. O. *et al.* *Pseudomonas* cyclic lipopeptides suppress the rice blast fungus  
719 *Magnaporthe oryzae* by induced resistance and direct antagonism. *Front. Plant Sci.* **10**, 901  
720 (2019).
- 721 30. Mansfield, J. *et al.* Top 10 plant pathogenic bacteria in molecular plant pathology. *Mol. Plant*  
722 *Pathol.* **13**, 614–629 (2012).
- 723 31. Molinatto, G. *et al.* Complete genome sequence of *Bacillus amyloliquefaciens* subsp.  
724 *plantarum* S499, a rhizobacterium that triggers plant defences and inhibits fungal

- 725 phytopathogens. *J. Biotechnol.* **238**, 56–59 (2016).
- 726 32. Fan, B. *et al.* *Bacillus velezensis* FZB42 in 2018: The gram-positive model strain for plant  
727 growth promotion and biocontrol. *Front. Microbiol.* **9**, 3389 (2018).
- 728 33. Pandin, C. *et al.* Complete genome sequence of *Bacillus velezensis* QST713: A biocontrol  
729 agent that protects *Agaricus bisporus* crops against the green mould disease. *J. Biotechnol.*  
730 **278**, 10–19 (2018).
- 731 34. Scholz, R. *et al.* Amylocyclin, a novel circular bacteriocin produced by *Bacillus*  
732 *amyloliquefaciens* FZB42. *J. Bacteriol.* **196**, 1842–1852 (2014).
- 733 35. Youard, Z. A., Mislin, G. L. A., Majcherczyk, P. A., Schalk, I. J. & Reimann, C.  
734 *Pseudomonas fluorescens* CHA0 produces enantio-pyochelin, the optical antipode of the  
735 *Pseudomonas aeruginosa* siderophore pyochelin. *J. Biol. Chem.* **282**, 35546–35553 (2007).
- 736 36. Grandchamp, G. M. *et al.* Pirated siderophores promote sporulation in *Bacillus subtilis*. *Appl.*  
737 *Environ. Microbiol.* **83**, 1–17 (2017).
- 738 37. Miethke, M. *et al.* Ferri-bacillibactin uptake and hydrolysis in *Bacillus subtilis*. *Mol. Microbiol.*  
739 **61**, 1413–1427 (2006).
- 740 38. Adler, C. *et al.* Catecholate siderophores protect bacteria from pyochelin toxicity. *PLoS One*  
741 **7**, (2012).
- 742 39. Trottmann, F., Franke, J., Ishida, K., García-Altare, M. & Hertweck, C. A pair of bacterial  
743 siderophores releases and traps an intercellular signal molecule: An unusual case of natural  
744 nitrono bioconjugation. *Angew. Chemie* **131**, 206–210 (2019).
- 745 40. Hartney, S. L. *et al.* Ferric-pyoverdine recognition by Fpv outer membrane proteins of  
746 *Pseudomonas protegens* Pf-5. *J. Bacteriol.* **195**, 765–776 (2013).
- 747 41. Rokni-Zadeh, H. *et al.* Genetic and functional characterization of cyclic lipopeptide white-line-  
748 inducing principle (WLIP) production by rice rhizosphere isolate *Pseudomonas putida*  
749 RW10S2. *Appl. Environ. Microbiol.* **78**, 4826–4834 (2012).



- 750 42. van Gestel, J., Vlamakis, H. & Kolter, R. From cell differentiation to cell collectives: *Bacillus*  
751 *subtilis* uses division of labor to migrate. *PLoS Biol.* **13**, 1–29 (2015).
- 752 43. Munsch, P. & Alatossava, T. The white-line-in-agar test is not specific for the two cultivated  
753 mushroom associated pseudomonads, *Pseudomonas tolaasii* and *Pseudomonas 'reactans'*.  
754 *Microbiol. Res.* **157**, 7–11 (2002).
- 755 44. Salari, F. *et al.* Draft Genome Sequence of *Pseudomonas aeruginosa* strain LMG 1272, an  
756 atypical white line reaction producer. *Microbiol. Resour. Announc.* **9**, (2020).
- 757 45. Xu, Z. *et al.* Antibiotic bacillomycin D affects iron acquisition and biofilm formation in *Bacillus*  
758 *velezensis* through a Btr-mediated FeuABC-dependent pathway. *Cell Rep.* **29**, 1192-1202.e5  
759 (2019).
- 760 46. Powers, M. J., Sanabria-Valentín, E., Bowers, A. A. & Shank, E. A. Inhibition of cell  
761 differentiation in *Bacillus subtilis* by *Pseudomonas protegens*. *J. Bacteriol.* **197**, 2129–2138  
762 (2015).
- 763 47. Molina-Santiago, C. *et al.* The extracellular matrix protects *Bacillus subtilis* colonies from  
764 *Pseudomonas* invasion and modulates plant co-colonization. *Nat. Commun.* **10**, (2019).
- 765 48. Liu, Y., Kyle, S. & Straight, P. D. Antibiotic stimulation of a *Bacillus subtilis* migratory  
766 response. *mSphere* **3**, 1–13 (2018).
- 767 49. Rosenberg, G. *et al.* Not so simple, not so subtle: The interspecies competition between  
768 *Bacillus simplex* and *Bacillus subtilis* and its impact on the evolution of biofilms. *npj Biofilms*  
769 *Microbiomes* **2**, 15027 (2016).
- 770 50. Straight, P. D., Willey, J. M. & Kolter, R. Interactions between *Streptomyces coelicolor* and  
771 *Bacillus subtilis*: Role of surfactants in raising aerial structures. *J. Bacteriol.* **188**, 4918–4925  
772 (2006).
- 773 51. Lee, N. *et al.* Iron competition triggers antibiotic biosynthesis in *Streptomyces coelicolor*  
774 during coculture with *Myxococcus xanthus*. *ISME J.* **14**, 1111–1124 (2020)



- 775 52. Kramer, J., Özkaya, Ö. & Kümmerli, R. Bacterial siderophores in community and host  
776 interactions. *Nat. Rev. Microbiol.* **18**, 152–163 (2020).
- 777 53. Niehus, R., Picot, A., Oliveira, N. M., Mitri, S. & Foster, K. R. The evolution of siderophore  
778 production as a competitive trait. *Evolution (N. Y.)*. **71**, 1443–1455 (2017).
- 779 54. Hibbing, M. E., Fuqua, C., Parsek, M. R. & Peterson, S. B. Bacterial competition: Surviving  
780 and thriving in the microbial jungle. *Nature Reviews Microbiology* **8** 15–25 (2010).
- 781 55. Gu, S. *et al.* Competition for iron drives phytopathogen control by natural rhizosphere  
782 microbiomes. *Nat. Microbiol.* **5**, 1002–1010 (2020).
- 783 56. Youard, Z. A., Wenner, N. & Reimann, C. Iron acquisition with the natural siderophore  
784 enantiomers pyochelin and enantio-pyochelin in *Pseudomonas* species. *BioMetals* **24**, 513–  
785 522 (2011).
- 786 57. Cornelis, P. Iron uptake and metabolism in pseudomonads. *Appl. Microbiol. Biotechnol.* **86**,  
787 1637–1645 (2010).
- 788 58. Ronnebaum, T. A. & Lamb, A. L. Nonribosomal peptides for iron acquisition: pyochelin  
789 biosynthesis as a case study. *Current Opinion in Structural Biology* **53**, 1–11 (2018).
- 790 59. Esmaeel, Q. *et al.* *Burkholderia* genome mining for nonribosomal peptide synthetases  
791 reveals a great potential for novel siderophores and lipopeptides synthesis.  
792 *Microbiologyopen* **5**, 512–526 (2016).
- 793 60. Seipke, R. F. *et al.* The plant pathogen *Streptomyces scabies* 87-22 has a functional  
794 pyochelin biosynthetic pathway that is regulated by TetR- and AfsR-family proteins.  
795 *Microbiology* **157**, 2681–2693 (2011).
- 796 61. Inahashi, Y. *et al.* Watasemycin biosynthesis in *Streptomyces venezuelae*: thiazoline C-  
797 methylation by a type B radical-SAM methylase homologue. *Chem. Sci.* **8**, 2823–2831  
798 (2017).
- 799 62. Jarmer, H., Berka, R., Knudsen, S. & Saxild, H. H. Transcriptome analysis documents

- 800 induced competence of *Bacillus subtilis* during nitrogen limiting conditions. *FEMS Microbiol.*  
801 *Lett.* **206**, 197–200 (2002).
- 802 63. Martínez-García, E. & de Lorenzo, V. Engineering multiple genomic deletions in Gram-  
803 negative bacteria: analysis of the multi-resistant antibiotic profile of *Pseudomonas putida*  
804 KT2440. *Environ. Microbiol.* **13**, 2702–2716 (2011).
- 805 64. Vacheron, J. *et al.* T6SS contributes to gut microbiome invasion and killing of an herbivorous  
806 pest insect by plant-beneficial *Pseudomonas protegens*. *ISME J.* **13**, 1318–1329 (2019).
- 807 65. Livak, K. J. & Schmittgen, T. D. Analysis of relative gene expression data using real-time  
808 quantitative PCR and the 2- $\Delta\Delta$ CT method. *Methods* **25**, 402–408 (2001).
- 809 66. Pluskal, T., Castillo, S., Villar-Briones, A. & Orešič, M. MZmine 2: Modular framework for  
810 processing, visualizing, and analyzing mass spectrometry-based molecular profile data.  
811 *BMC Bioinformatics* **11**, (2010).
- 812 67. Hoegy, F., Mislin, G. L. A. & Schalk, I. J. Pyoverdine and pyochelin measurements. *Methods*  
813 *Mol. Biol.* **1149**, 293–301 (2014).
- 814 68. Kune, C. *et al.* Rapid visualization of chemically related compounds using Kendrick mass  
815 defect as a filter in mass spectrometry imaging. *Anal. Chem.* **91**, 13112–13118 (2019).
- 816 69. R Core Team (2020). R: A language and environment for statistical computing. R Foundation  
817 for Statistical Computing, Vienna, Austria. <https://www.r-project.org/> (2020).

818

## 819 **Acknowledgments**

820 We gratefully acknowledge Sébastien Rigali, Alexandre Jousset and Loïc Ongena for critically  
821 reading the manuscript. We thank C. Keel for the kind gift of strains and J. Vacheron for the very  
822 helpful indications on *Pseudomonas* mutagenesis. This work was supported by the EU Interreg V  
823 France-Wallonie-Vlaanderen portfolio SmartBiocontrol (Bioprotect and Bioscreen projects, avec le

824 soutien du Fonds européen de développement régional - Met steun van het Europees Fonds voor  
825 Regionale Ontwikkeling), by the European Union Horizon 2020 research and innovation program  
826 under grant agreement No. 731077 and by the EOS project ID 30650620 from the FWO/F.R.S.-  
827 FNRS. The MALDI FT-ICR SolariX XR was funded by FEDER BIOMED HUB Technology Support  
828 (number 2.2.1/996). AA is recipient of a F.R.I.A. fellowship (Formation à la Recherche dans  
829 l'Industrie et l'Agriculture) and MO is senior research associate at the F.R.S.-F.N.R.S.

830

### 831 **Author contributions**

832 SA, TM, AR and AA performed most of the co-culture and *in planta* experiments. SA and TM  
833 performed most of molecular biology experiments with help of GH and SS for mutant generation  
834 and of SS for transcriptomics. TM and GH did genome mining. AR and AA were involved in all  
835 aspects of metabolomics using UPLC-MS. Data analysis was done by SA, TM, AA and AR. AM, AA  
836 and EDP performed the MALDI FT-ICR experiments and analyzed the data. MH and RDM provided  
837 *Pseudomonas* strains/mutants and also supported the study by providing intellectual input. SA, TM  
838 and MO mainly wrote the manuscript. All of the authors commented on the manuscript and  
839 contributed to the final form. MO supervised the study.

840

### 841 **Competing interests**

842 The authors declare no competing interests.

843

Figure 1

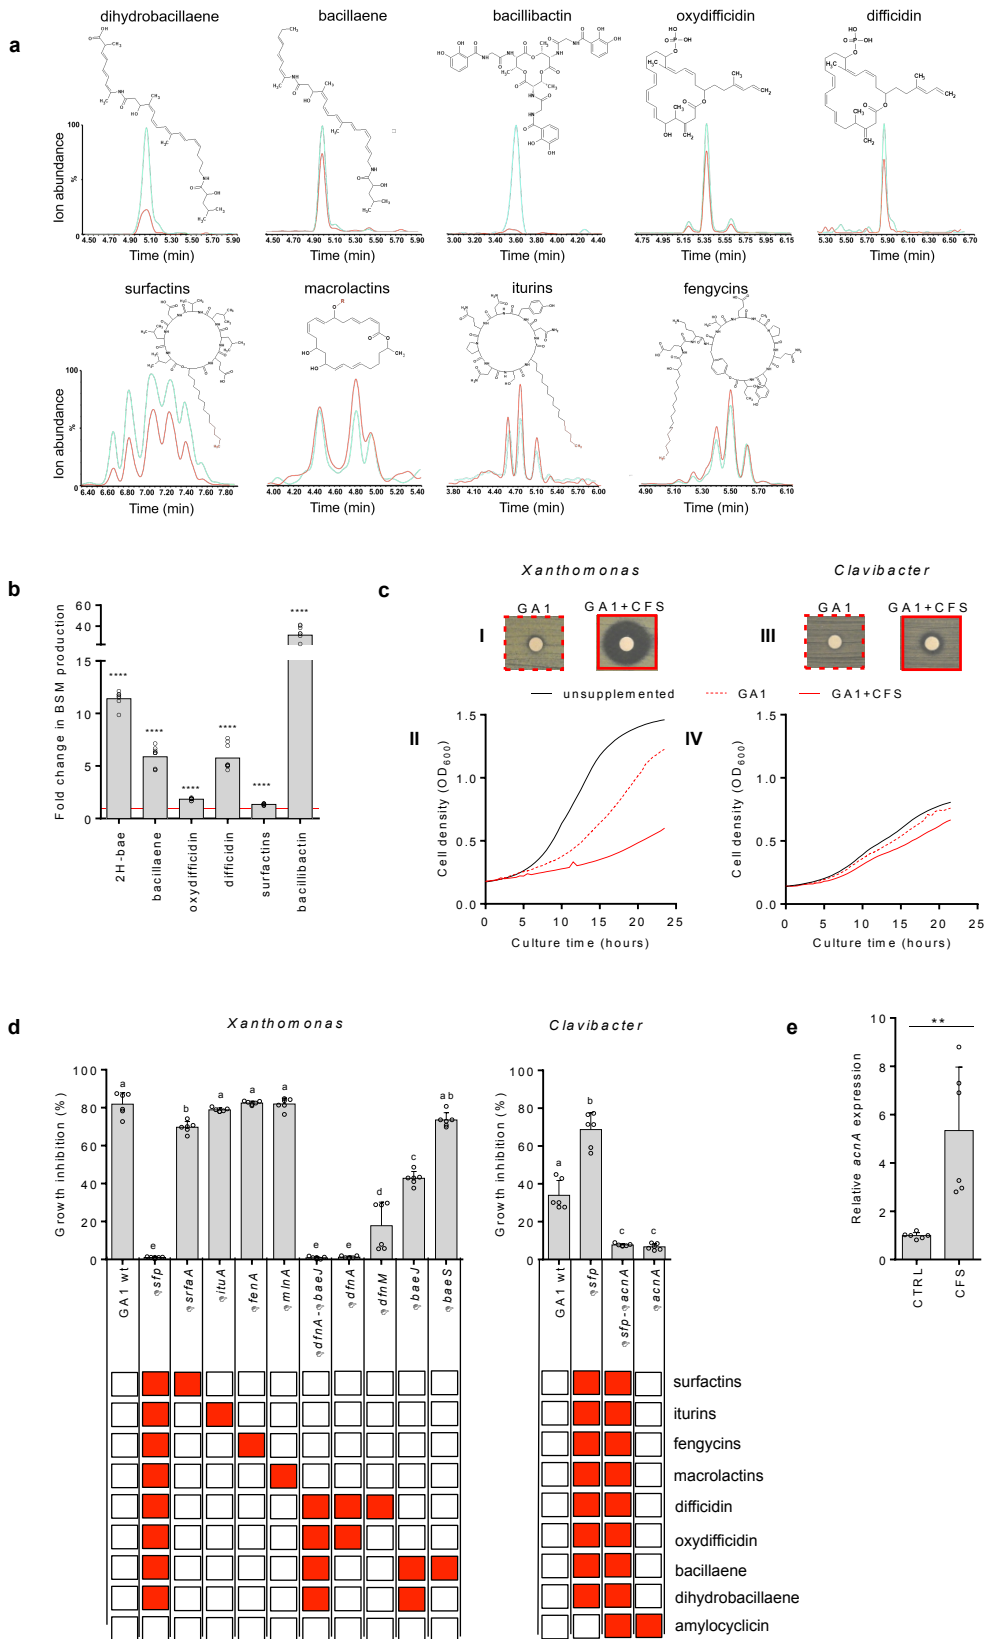

Figure 2

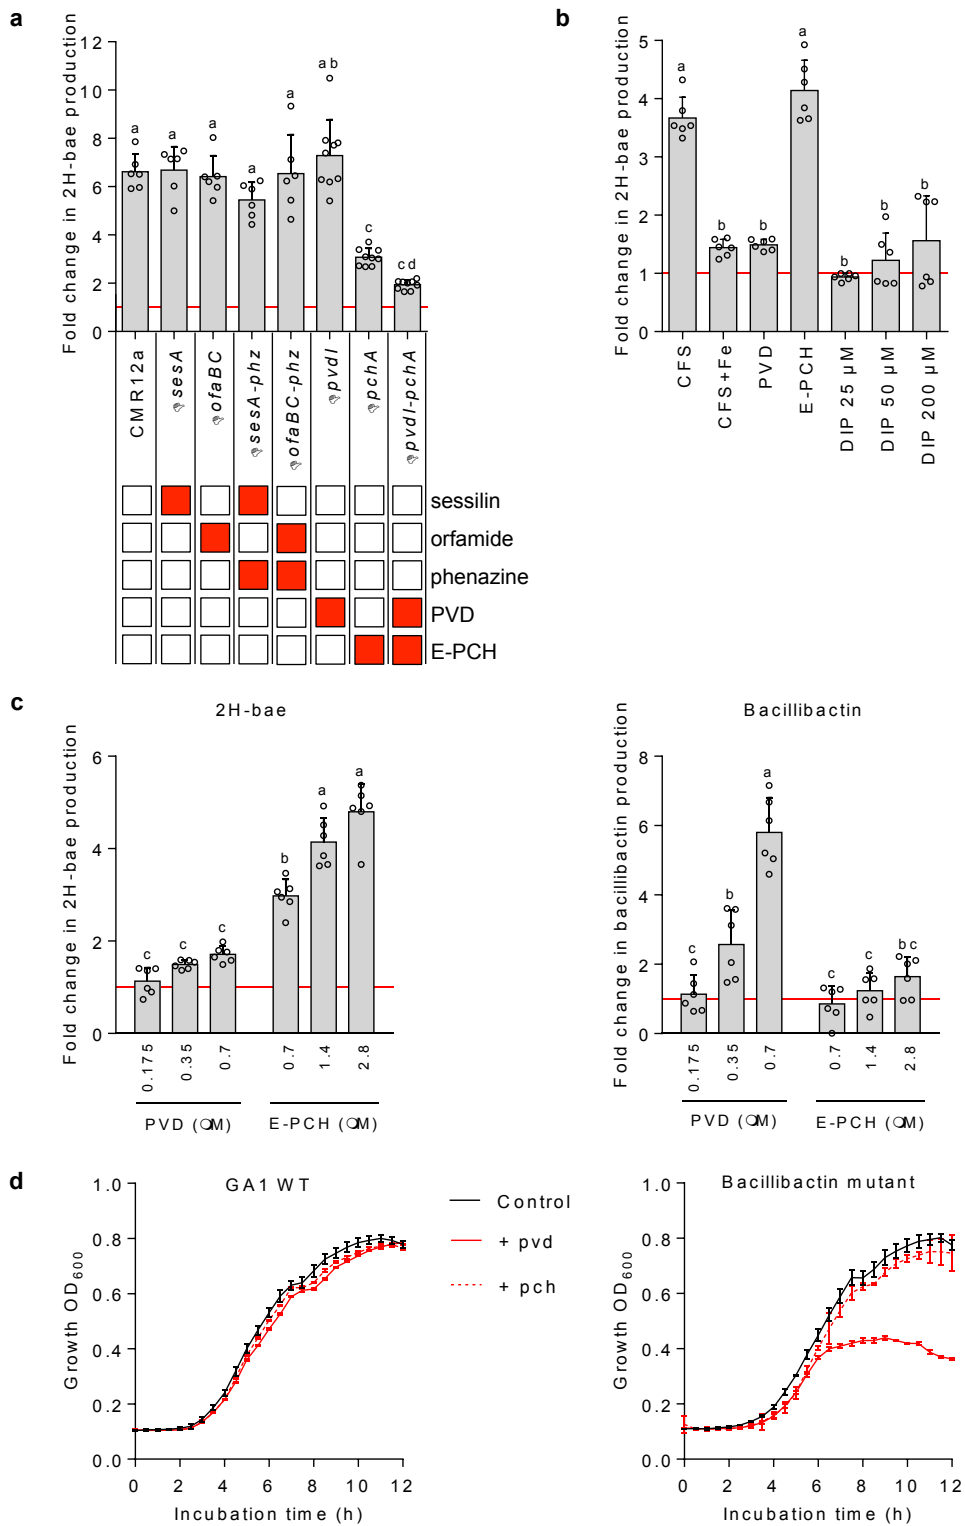

Figure 3

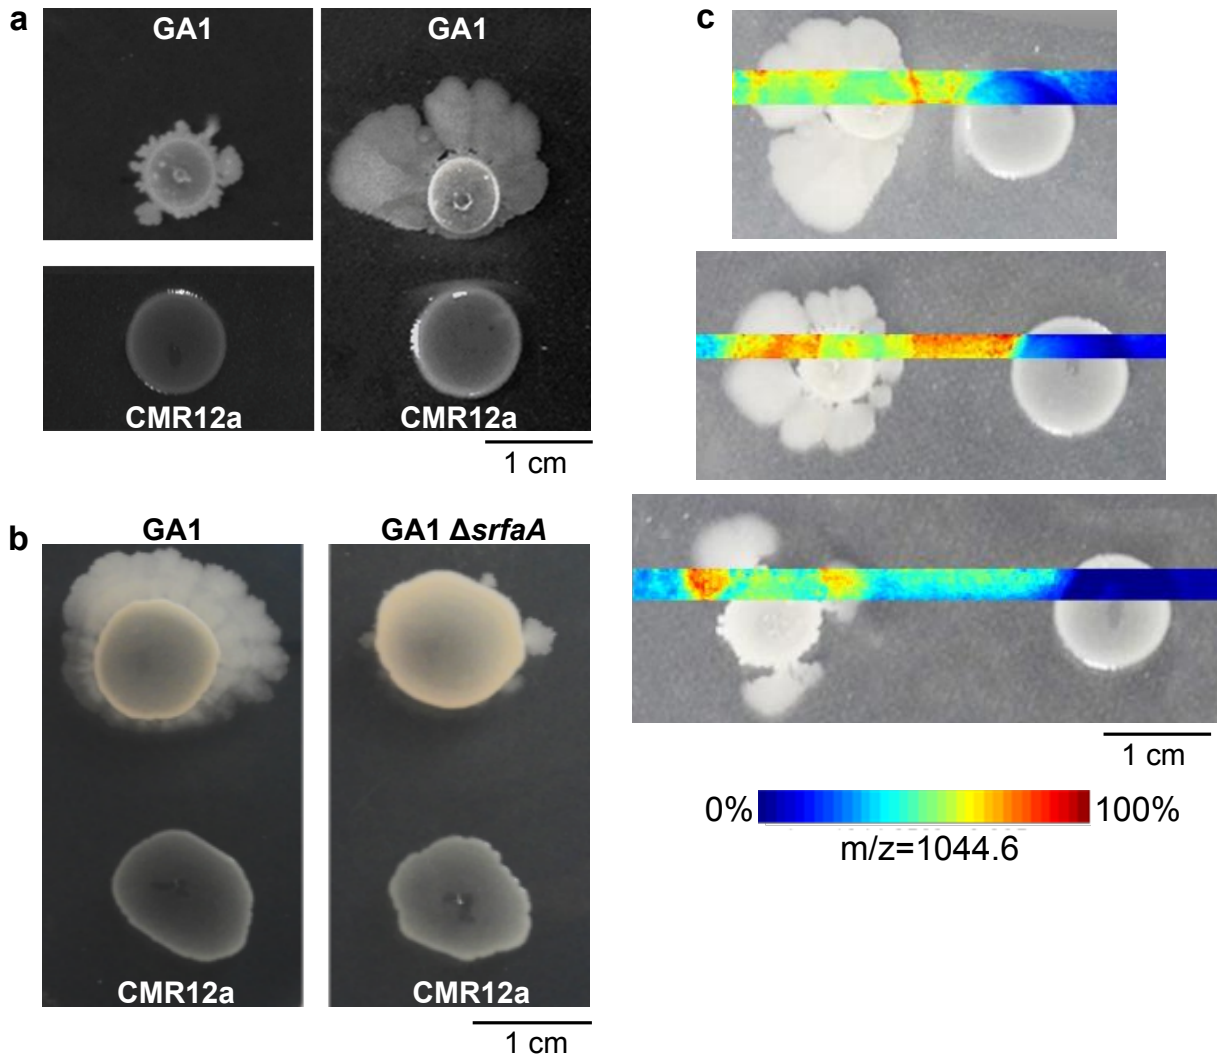

Figure 4

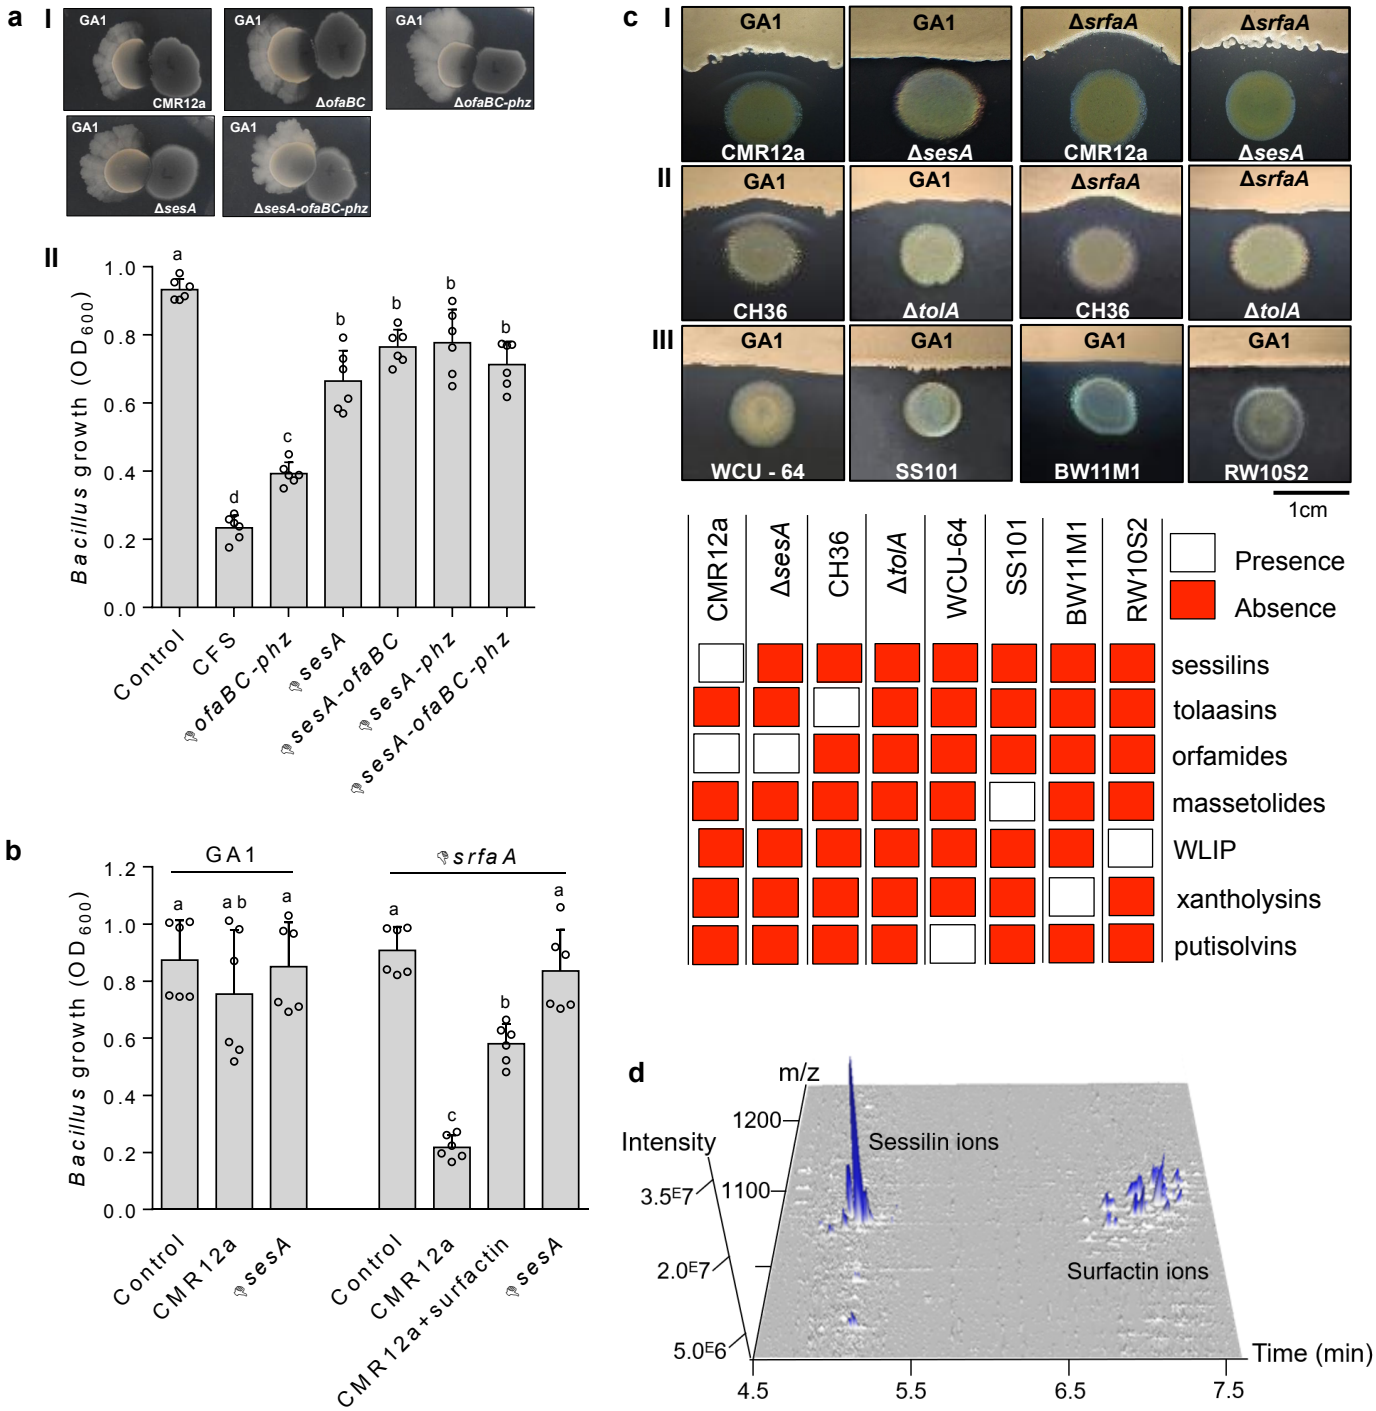

Figure 5

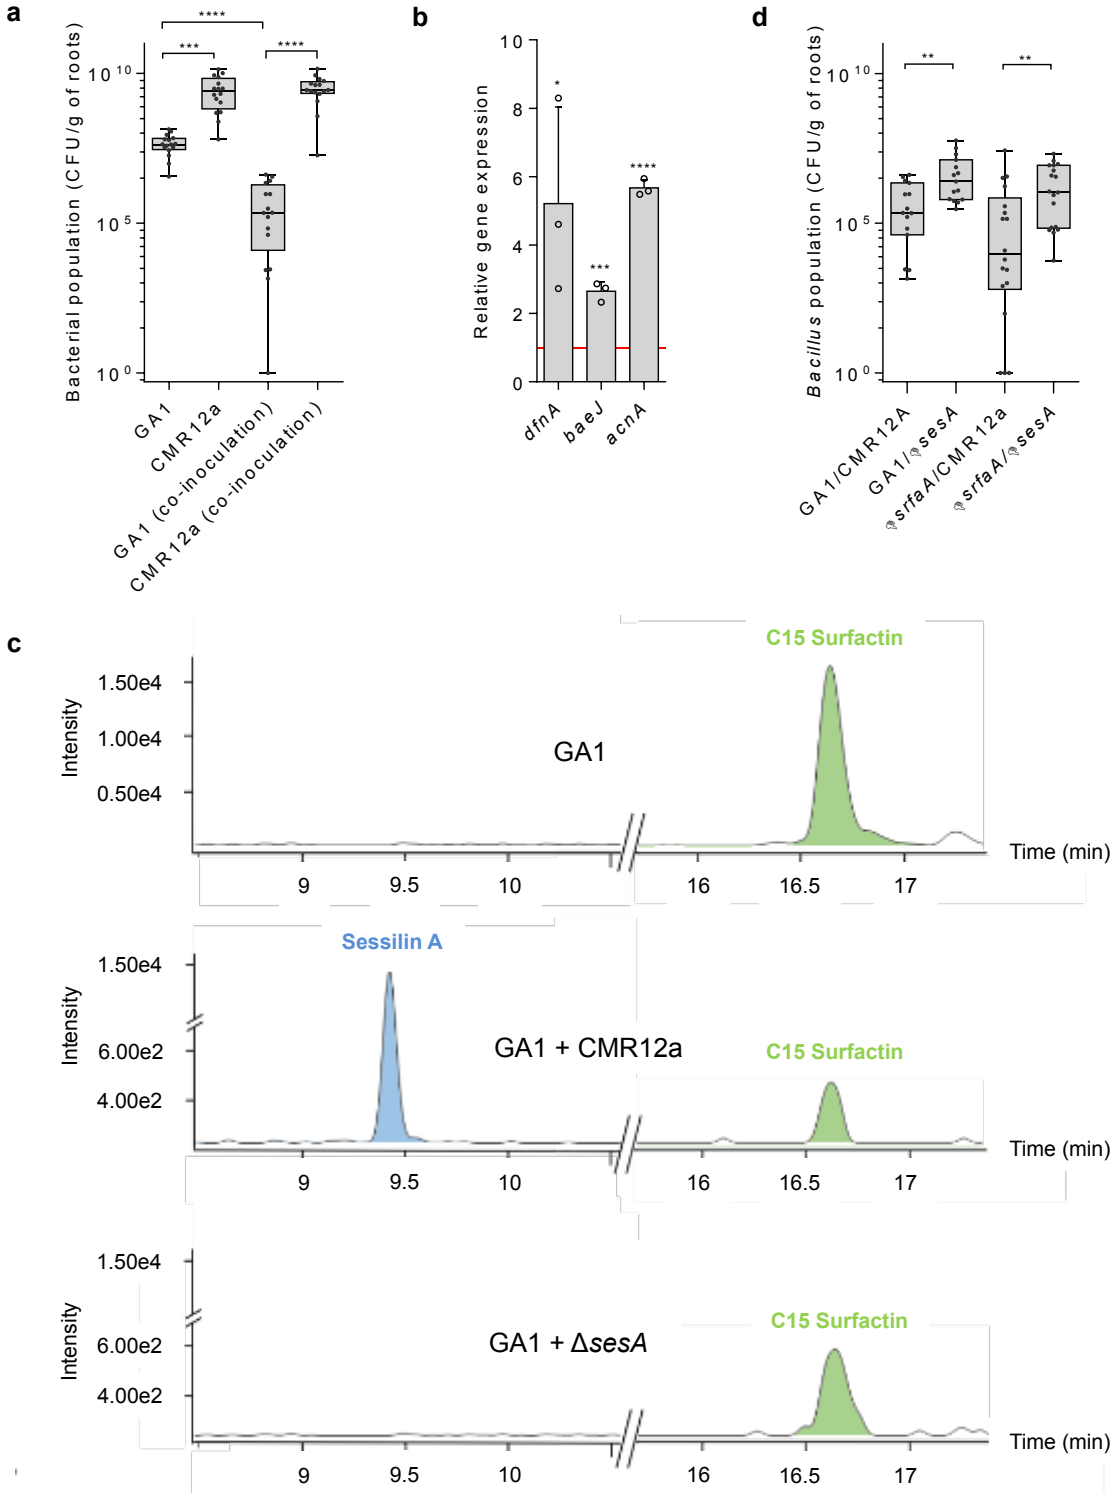

Source: https://www.biorxiv.org/content/10.1101/2021.02.22.432387v2.full.pdf
